# Supplementary material for: Biomass-derived substrate hydrogenation over rhodium nanoparticles supported on functionalized mesoporous silica
Source: Royal Society of Chemistry journal article supplement (doi:10.1039/d4nr02579b), 2024-01-01
Supplement: d4nr02579b1.pdf [file d4nr02579b1.pdf]

## Supporting Information

# Biomass-derived substrates hydrogenation over Rhodium Nanoparticles Supported on Functionalized Mesoporous Silica

Israel T. Pulido-Díaz <sup>[a,b]</sup>, Draco Martínez <sup>[a]</sup>, Karla P. Salas-Martin <sup>[a]</sup>, Benjamín Portales-Martínez <sup>[d]</sup>, Antonio Reina <sup>[a]</sup>, Dominique Agustín <sup>[b,c]</sup>, Itzel Guerrero-Ríos <sup>[a]\*</sup>

<sup>a</sup> Departamento de Química Inorgánica y Nuclear, Facultad de Química, UNAM, Circuito Escolar S/N, Coyoacán, Cd. Universitaria, 04510 Ciudad de México, México.

<sup>b</sup> Centre National de la Recherche Scientifique (CNRS), Laboratoire de Chimie de Coordination (LCC), Université de Toulouse, UPS, INPT, 205, route de Narbonne, 31077 Toulouse, France

<sup>c</sup> Université de Toulouse, IUT P. Sabatier, Département de Chimie, Av. G. Pompidou, BP 20258, 81104 Castres CEDEX, France

<sup>d</sup> CONACYT, Centro de Investigación en Ciencia Aplicada y Tecnología Avanzada, Laboratorio Nacional de Conversión y Almacenamiento de Energía, Instituto Politécnico Nacional, Calzada Legaría 694, Col. Irrigación, Ciudad de México, 11500, México

### TABLE OF CONTENTS

|                                                                 |         |
|-----------------------------------------------------------------|---------|
| A. Infrared spectra                                             | S2-S3   |
| B. TGA thermograms                                              | S4      |
| C. Powder X-Ray Diffraction data                                | S5      |
| D. <sup>29</sup> Si UDEFT deconvolution data                    | S5      |
| E. <sup>13</sup> C CP-MAS spectra.                              | S6      |
| F. Nitrogen adsorption/desorption isotherms                     | S7      |
| G. TEM and SEM micrographs with EDX analysis of pristine SBA-15 | S8-S9   |
| H. TEM micrographs with EDX analysis of RhNPs@MMS               | S10-S14 |
| I. XPS spectra of RhNPs@MMS                                     | S15-S18 |
| J. Calculation specific surface area and metal Dispersion       | S19     |
| K. Selected Catalytic Reactions                                 | S20     |
| L. NMR spectra of catalytic products                            | S22     |
| M. Bibliography                                                 | S41     |

## A. Infrared spectra

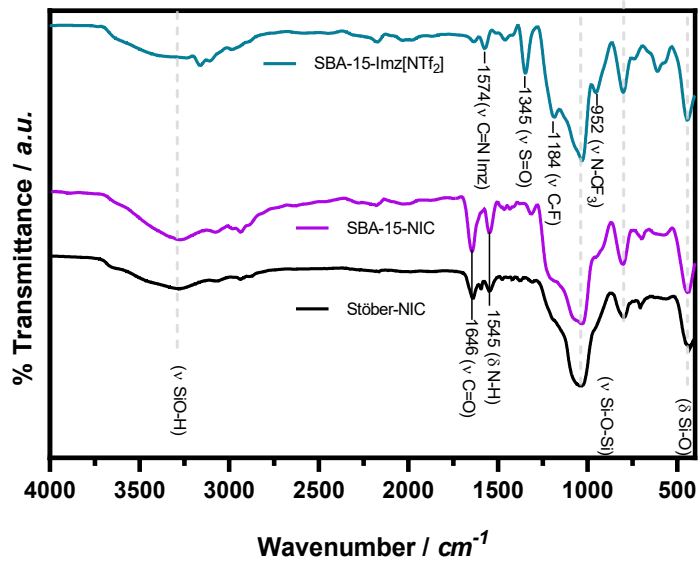

Figure S1. FTIR (ATR) spectra of functionalized SBA-15 based materials and Stöber silica.

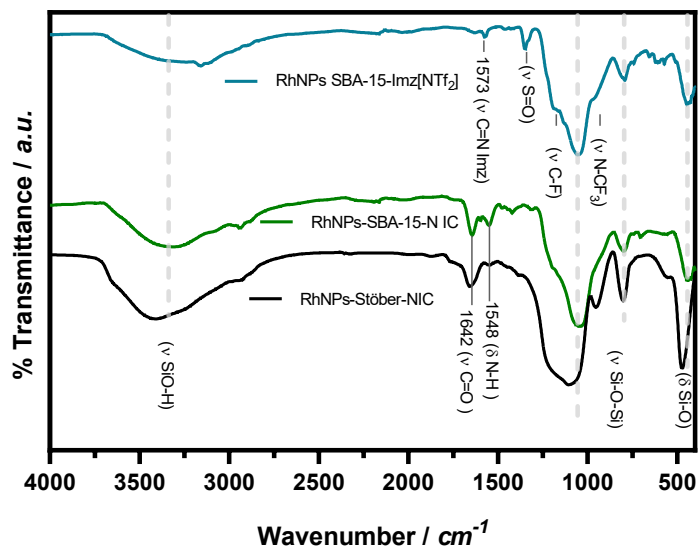

Figure S2. FTIR (ATR) of RhNPs supported on functionalized SBA-15 and Stöber silica

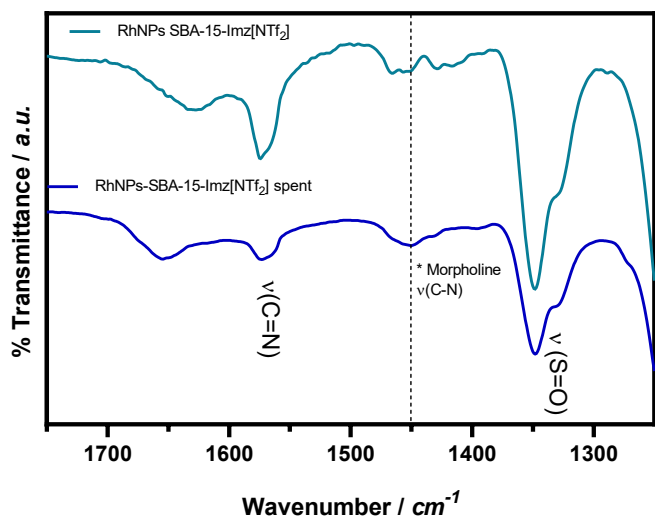

**Figure S3.** FTIR (ATR) of RhNPs@SBA-15-Imz [NTf<sub>2</sub>] before and after phenol reductive amination in 1750-1250  $\text{cm}^{-1}$  region.

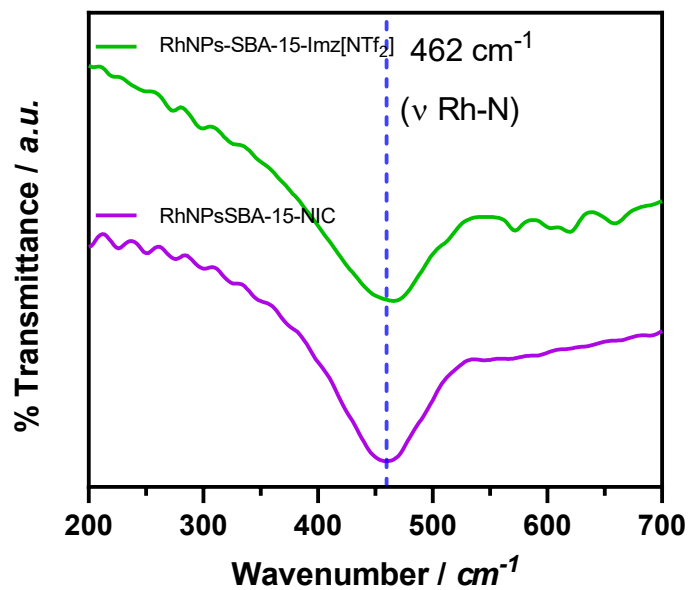

**Figure S4.** Far infrared spectra of RhNPs supported on functionalized SBA-15

## B. TGA thermograms

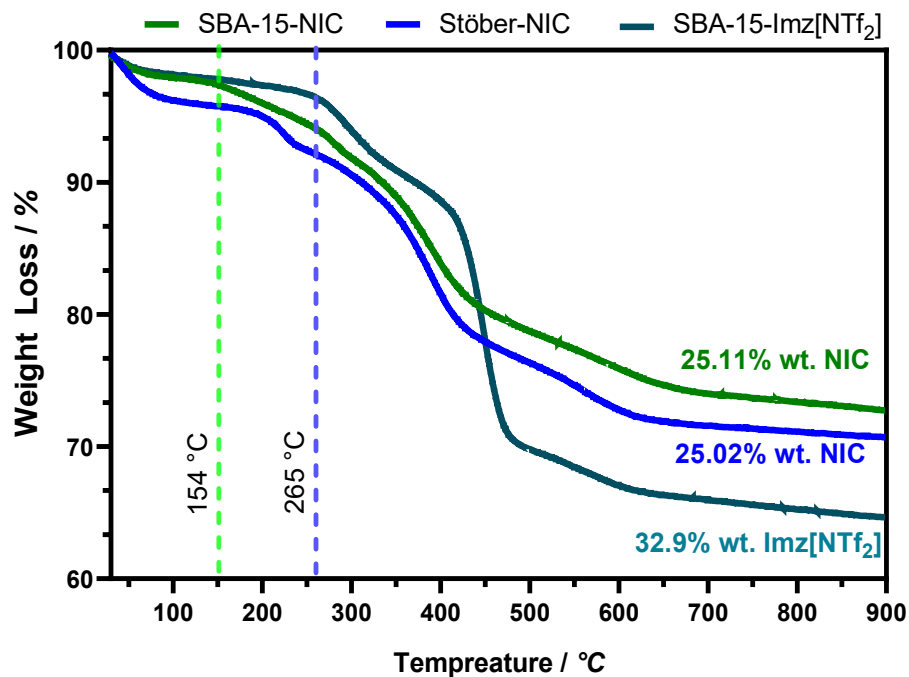

Figure S5. TGA curve of functionalized SBA-15 and Stöber silica

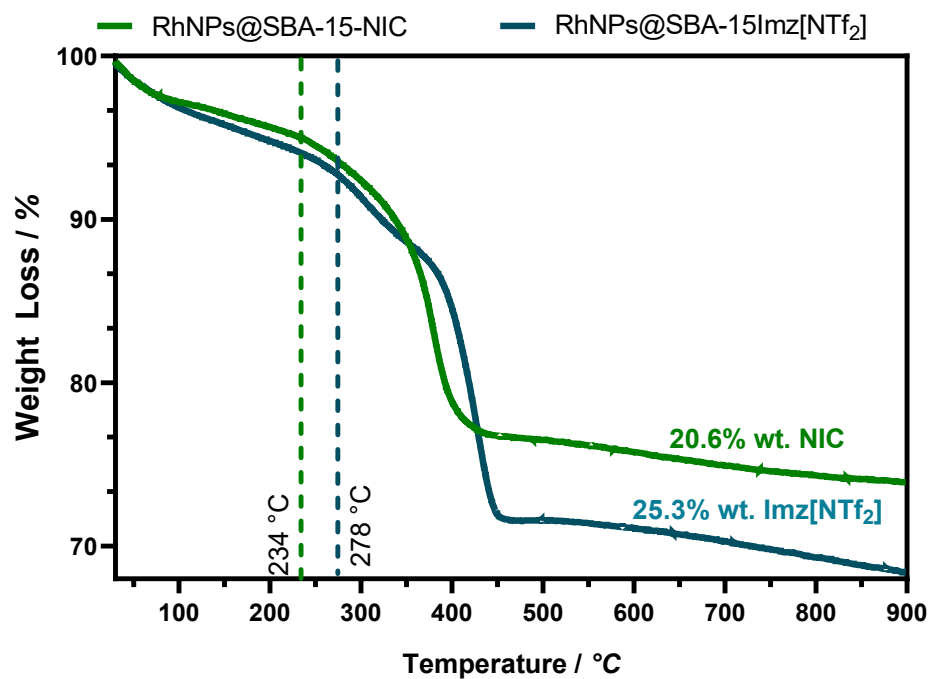

Figure S6. TGA curve of RhNPs supported in functionalized SBA-15.

## C. PXRD data

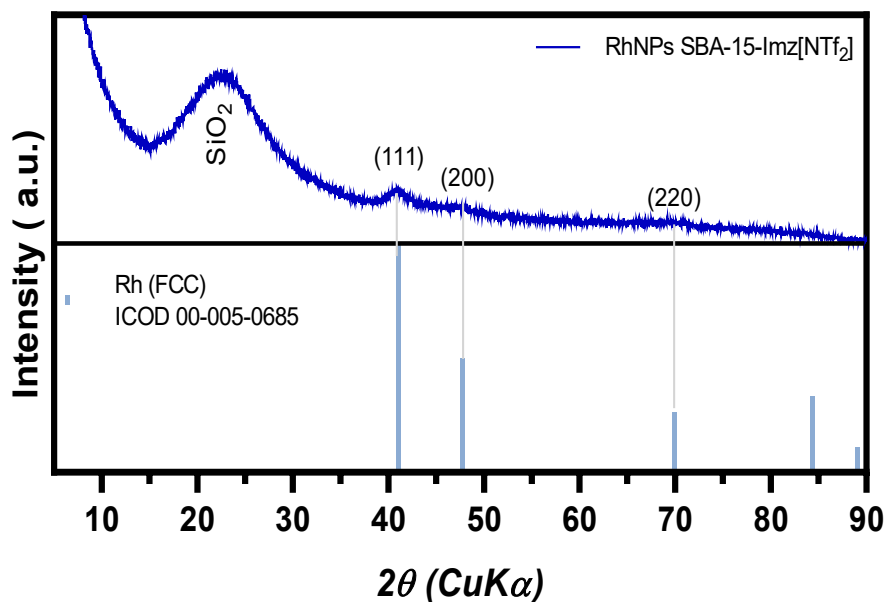Figure S7. PXRD of RhNPs@SBA-15-Imz[NTf<sub>2</sub>].D. <sup>29</sup>Si NMR deconvolution dataTable S1. Relative concentration of T<sup>n</sup> and Q<sup>n</sup> sites obtained from <sup>29</sup>Si UDEFT spectra.

| Material                       | <sup>29</sup> Si-UDEFT-MAS <sup>a</sup> |                |                |                |                |                | φ ratio | % of silane Grafting <sup>b</sup> | % of Silanols (Si-OH) <sup>b</sup> | Grafting density (mmol g <sup>-1</sup> ) <sup>c</sup> | BET Surface area (m <sup>2</sup> g <sup>-1</sup> ) | Surface coverage (molecules nm <sup>-2</sup> ) |
|--------------------------------|-----------------------------------------|----------------|----------------|----------------|----------------|----------------|---------|-----------------------------------|------------------------------------|-------------------------------------------------------|----------------------------------------------------|------------------------------------------------|
|                                | T <sup>1</sup>                          | T <sup>2</sup> | T <sup>3</sup> | Q <sup>2</sup> | Q <sup>3</sup> | Q <sup>4</sup> |         |                                   |                                    |                                                       |                                                    |                                                |
| SBA-15-Imz [NTf <sub>2</sub> ] | 0.5                                     | 5.2            | 5.7            | 6.6            | 16.9           | 65.2           | 0.49    | 11.4                              | 23.5                               | 1.1                                                   | 279                                                | 2.4                                            |
| SBA-15-NIC                     | 1.4                                     | 7.6            | 3.9            | 1.8            | 22.2           | 63.1           | 0.53    | 12.9                              | 24.0                               | 2.1                                                   | 328                                                | 3.9                                            |

a) Percentage Area after deconvolution of <sup>29</sup>Si NMR spectrum. b) Determined based on the relative concentrations of T<sup>n</sup> and Q<sup>n</sup>. c) Determined by E.A and TGA.

E.  $^{13}\text{C}$  CP-MAS Spectra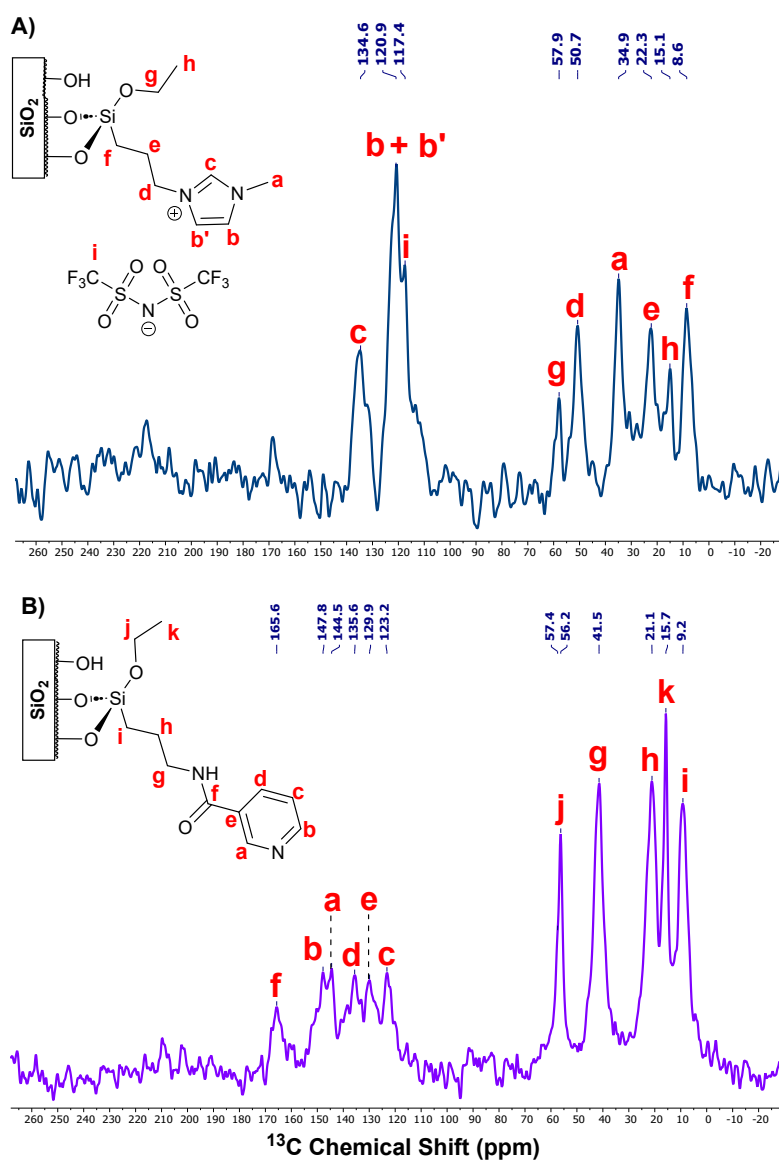Figure S8. Solid  $^{13}\text{C}$  CP-MAS NMR spectrum of SBA-15-Imz[NTf<sub>2</sub>] (A), and SBA-15-NIC (B)

## F. Nitrogen sorption/desorption isotherms at 77 K of MMS

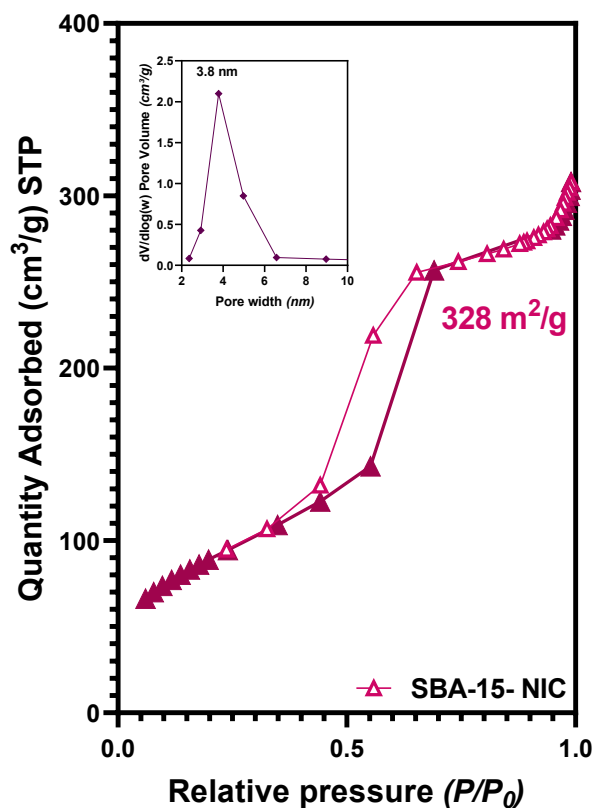

**Figure S9.** Adsorption-desorption isotherms of functionalized SBA-15 with pore size.

**Table S2** BET isotherms analysis of functionalized silicas.

| Entry | Material                                  | $S_{\text{BET}}$<br>( $\text{m}^2 \text{g}^{-1}$ ) <sup>a</sup> | Pore width <sup>b</sup><br>(nm) |
|-------|-------------------------------------------|-----------------------------------------------------------------|---------------------------------|
| 1     | <b>SBA-15</b>                             | 902                                                             | 5.7                             |
| 2     | <b>SBA-15 Imz[NTf<sub>2</sub>]</b>        | 279                                                             | 5.4                             |
| 3     | <b>SBA-15 NIC</b>                         | 328                                                             | 3.8                             |
| 4     | <b>RhNPs@ SBA-15 Imz[NTf<sub>2</sub>]</b> | 211                                                             | 5.4                             |

<sup>a</sup> Calculated using Brunauer–Emmett–Teller (BET) model on the adsorption branch in the range of relative pressure (P/P<sub>0</sub>) from 0.06 to 0.196.

<sup>b</sup> Calculated using the BJH model for cylindrical pores

**G. TEM and SEM micrographs with EDX analysis of pristine SBA-15**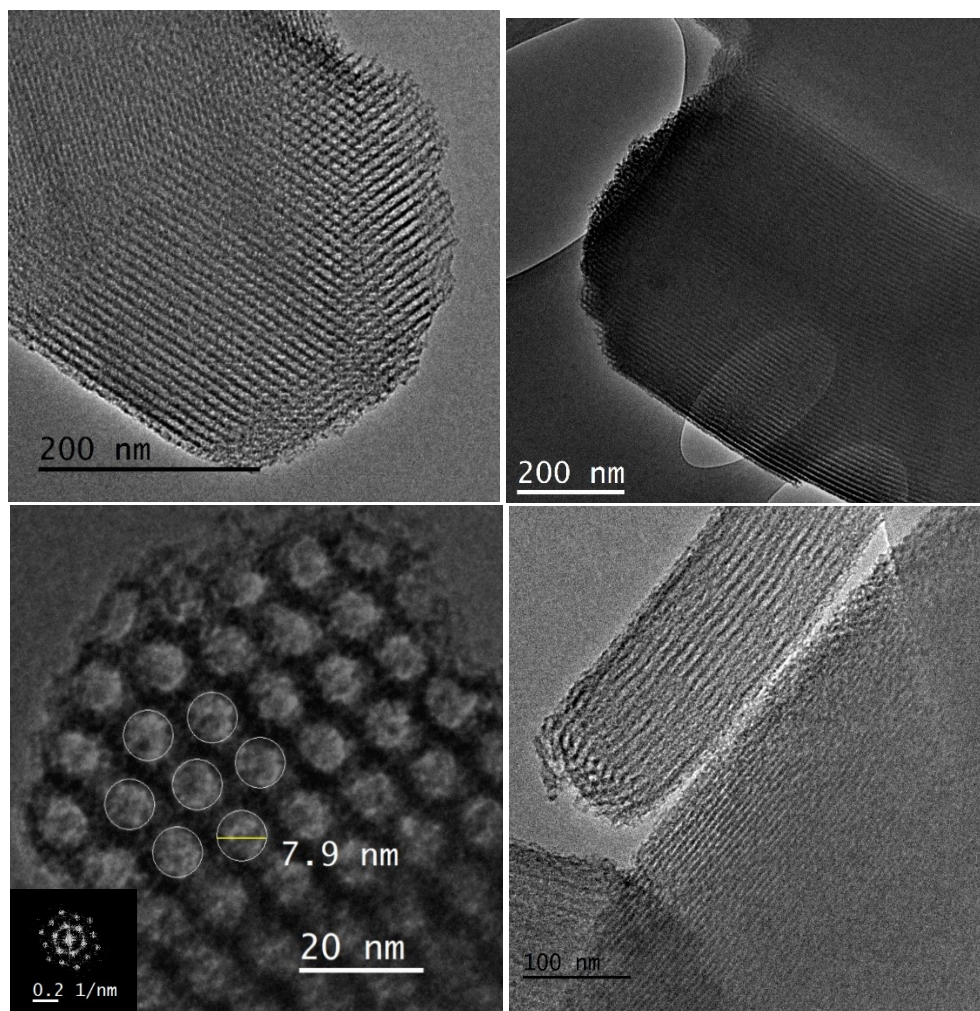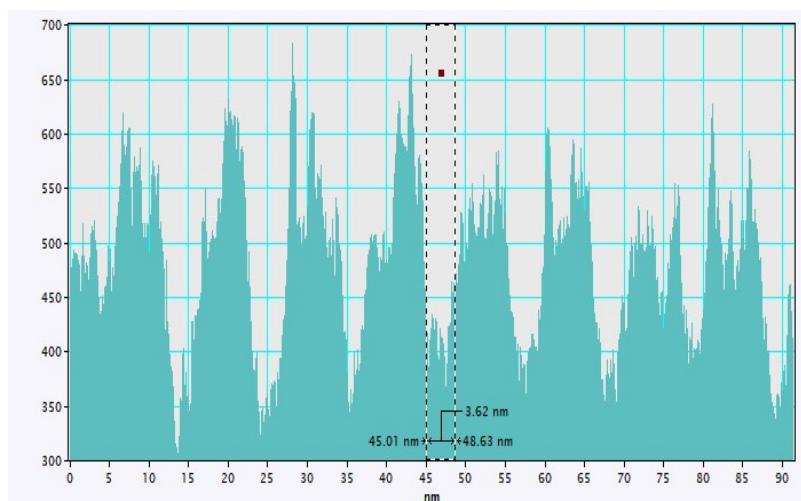

**Figure S10.** TEM micrographs of pristine calcinated SBA-15 where it showed a ca. 7.9 nm of pore diameter and 3.6 nm of walls width.



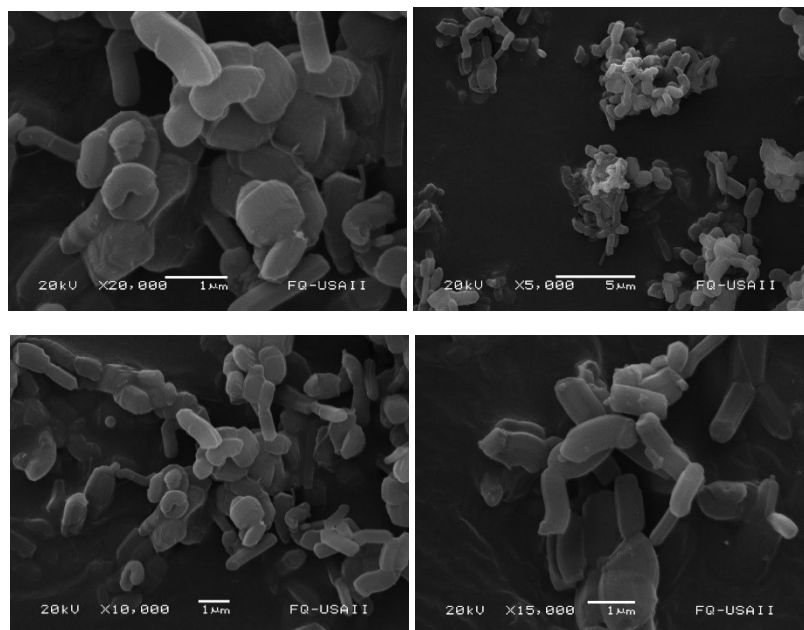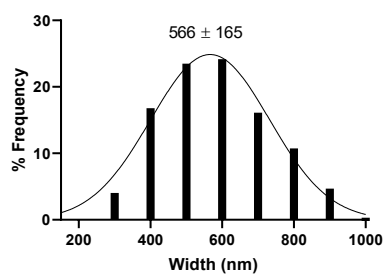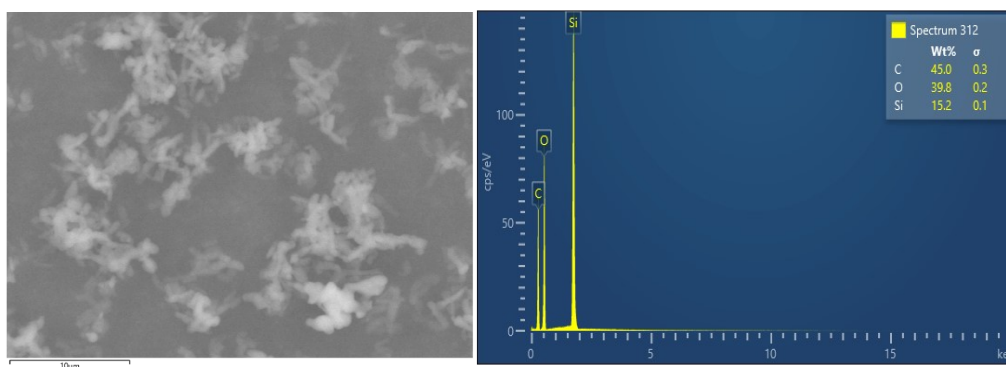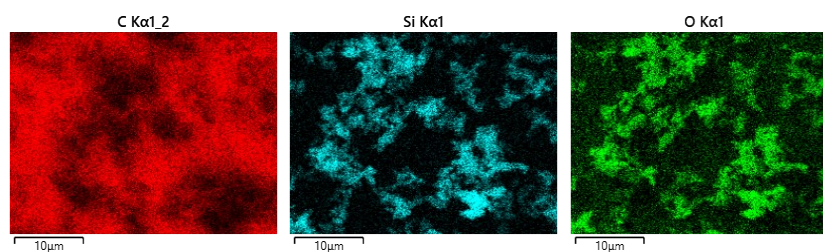

**Figure S11.** SEM micrographs of pristine calcinated SBA-15 with particles size distribution ( $566 \pm 165$ ) with EDX and element mapping.

## H. TEM micrographs with EDX analysis of RhNPs@MMS

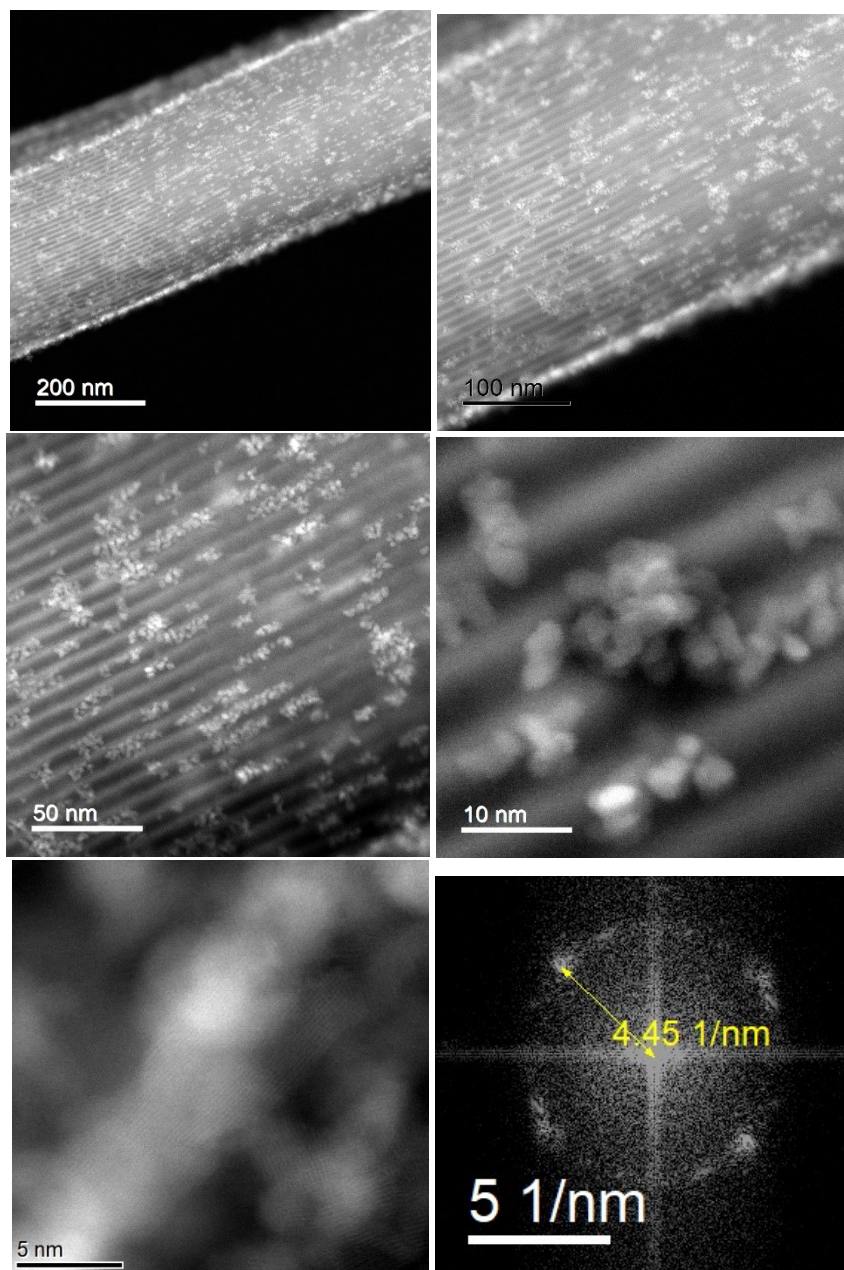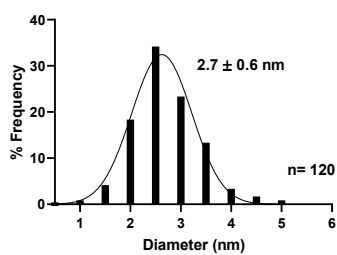

**Figure S12.** HAADF-STEM images of RhNPs@SBA-15-Imz[NTf<sub>2</sub>] with FFT. Mean diameter:  $2.7 \pm 0.6$  nm.

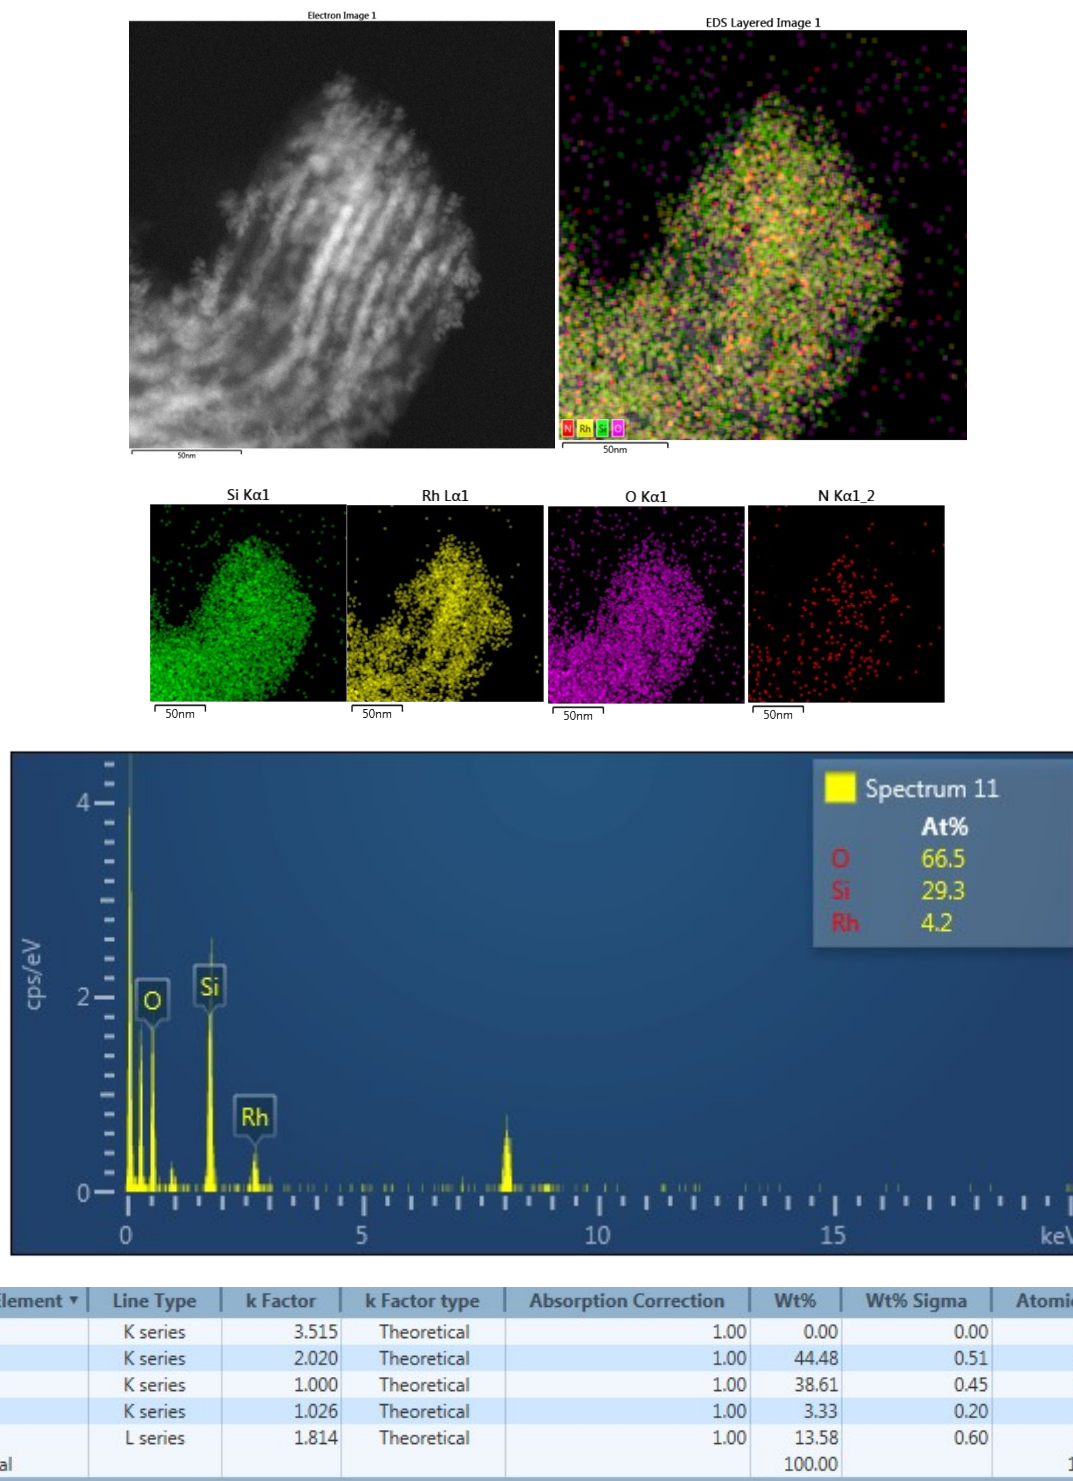

**Figure S13.** Element mapping and EDX quantification of RhNPs@SBA-15-Imz[NTf<sub>2</sub>]

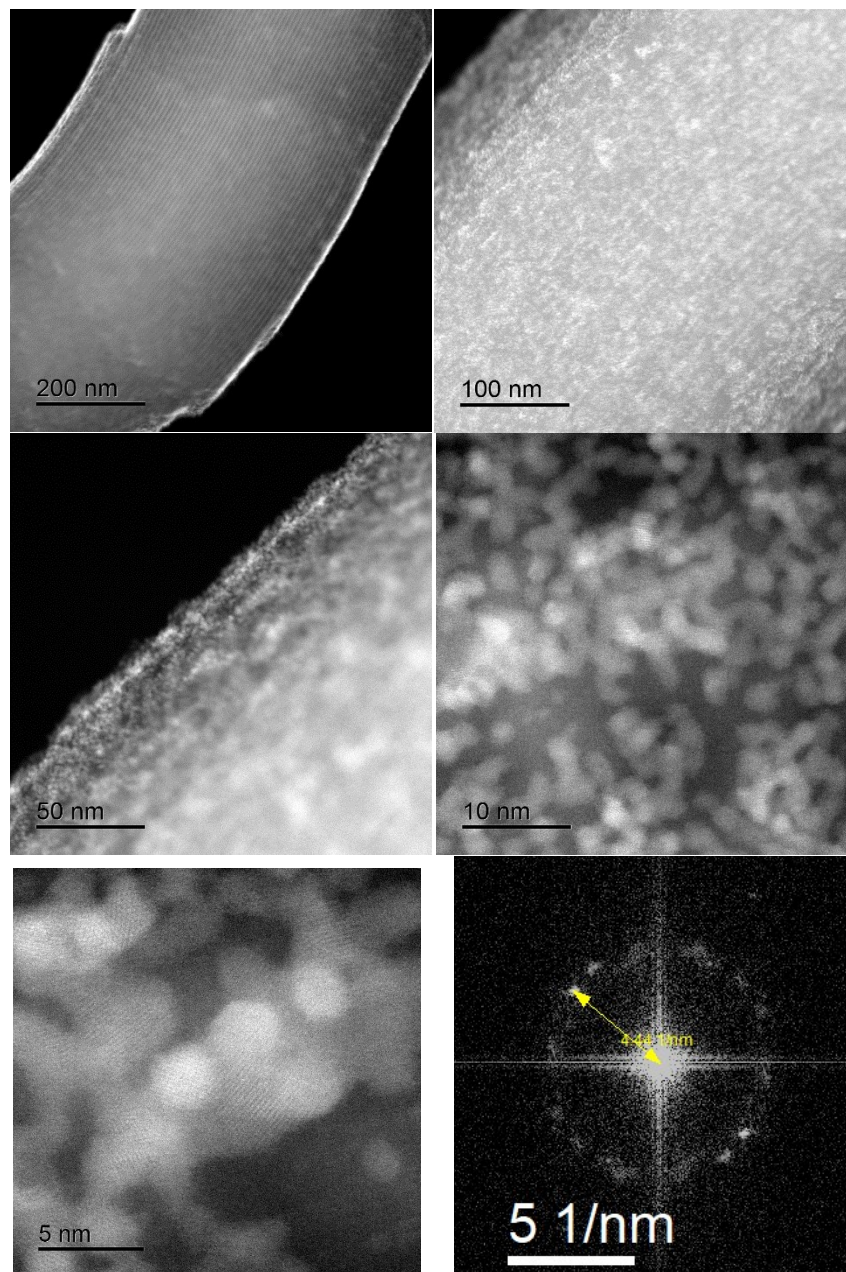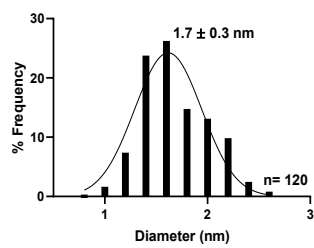

**Figure S14.** HAADF-STEM images of RhNPs@SBA-15NIC with FFT. Mean diameter:  $1.7 \pm 0.3$  nm.

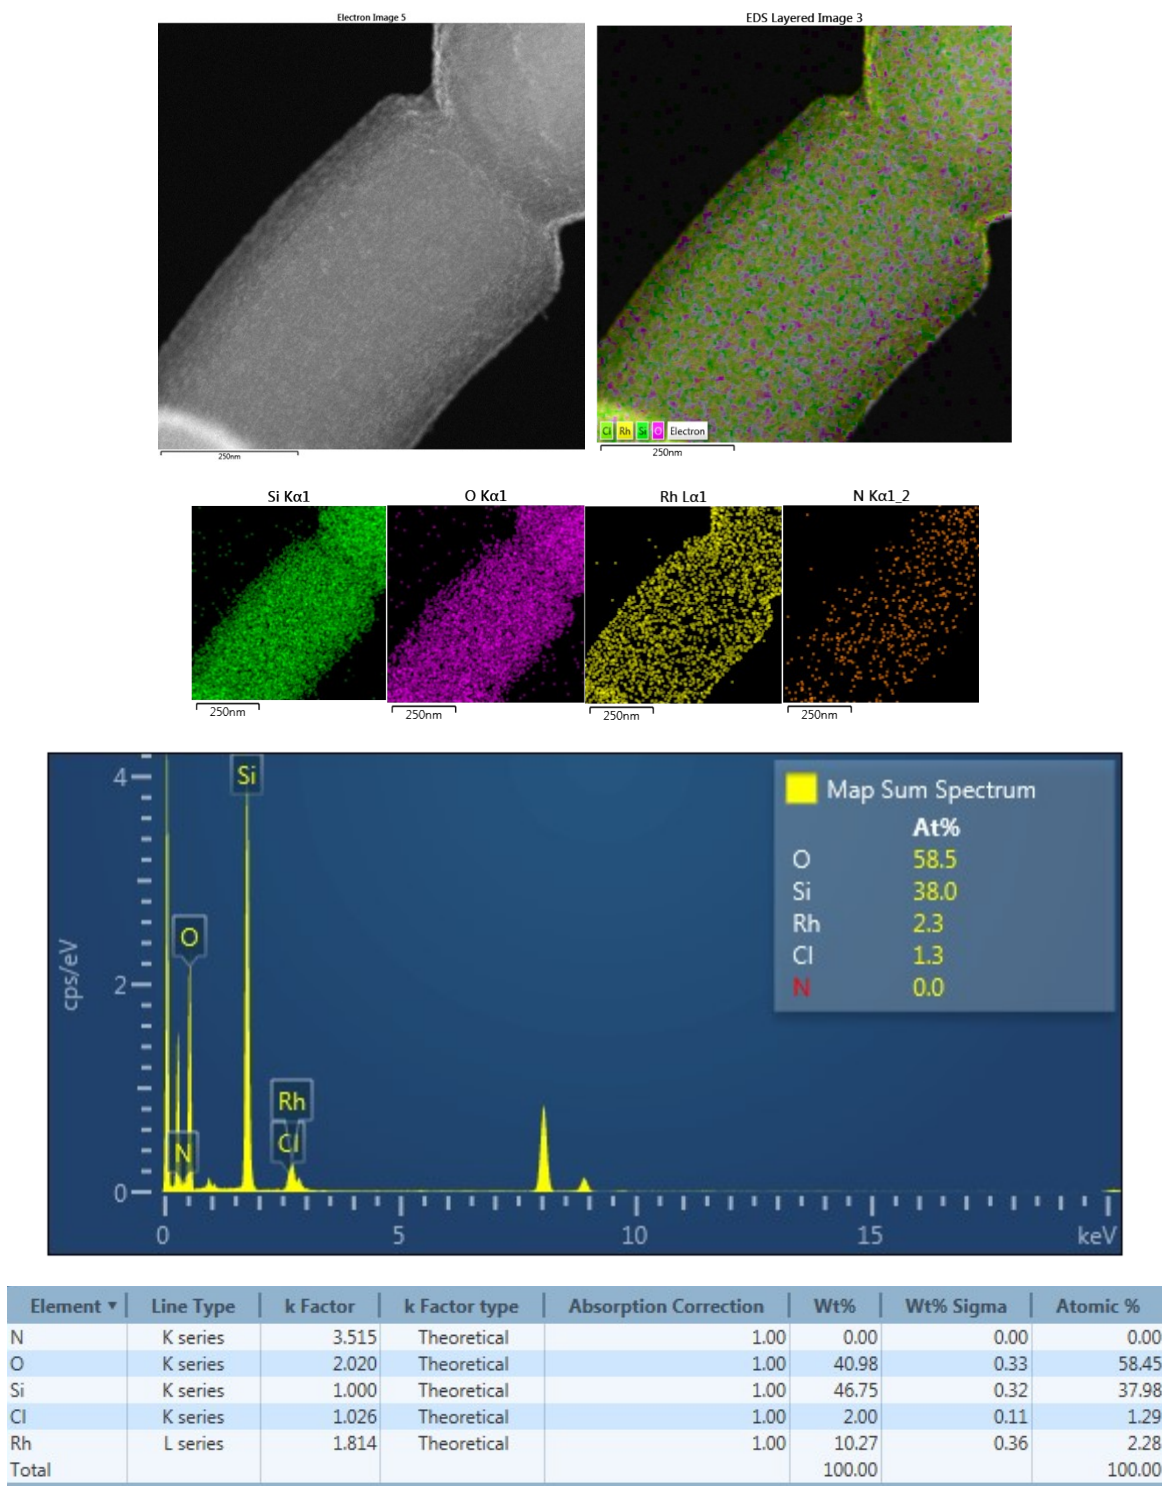

Figure S15. Element mapping and EDX quantification of RhNPs@SBA-15-NIC

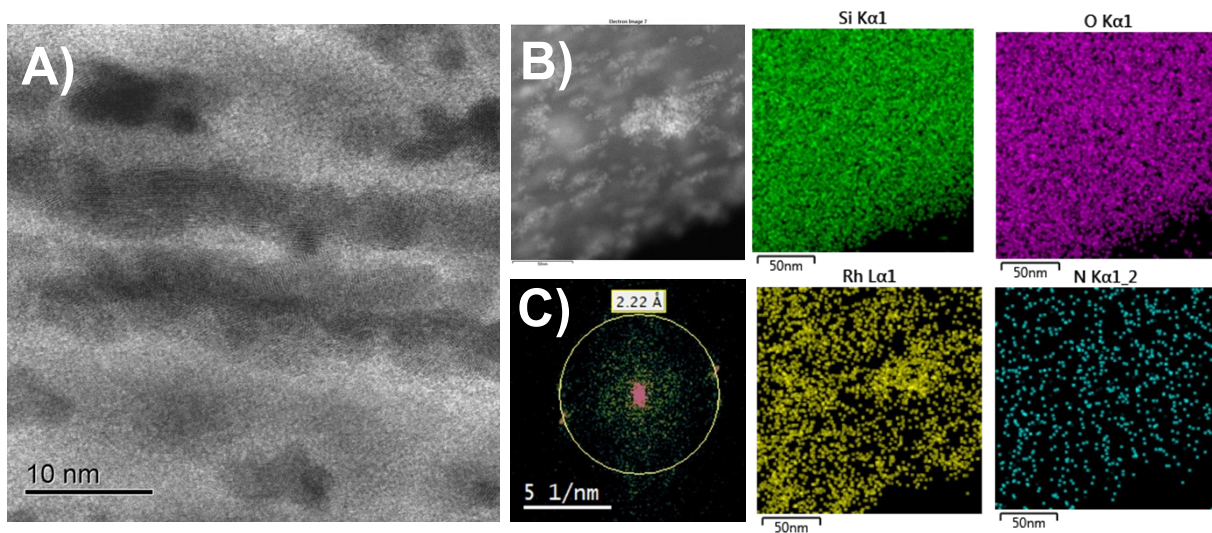

**Figure S16.** STEM image of RhNPs in spent catalyst (A) with EDX elemental mapping (B) and FFT of RhNPs (C).

## I. XPS spectra of RhNPs@MMS

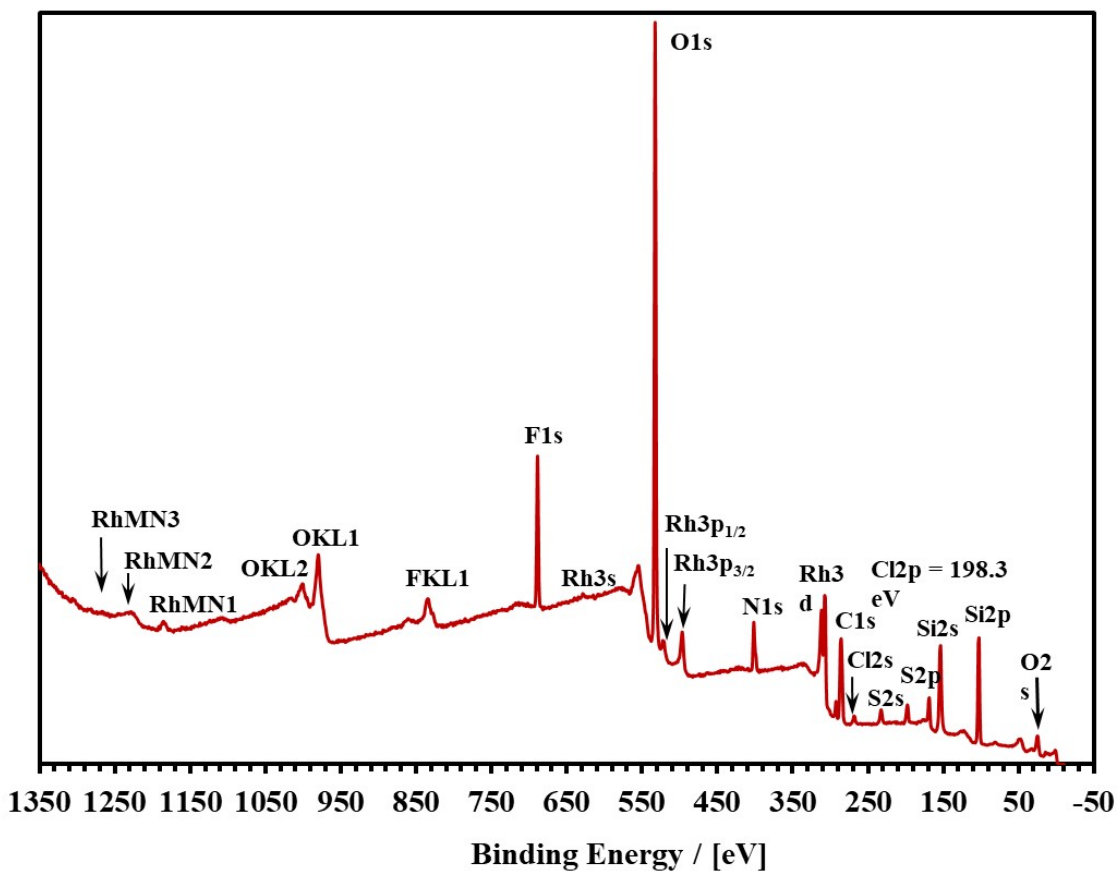

Figure S17. XPS survey of RhNPs@SBA-15Imz[NTf2]

Table S3 Element distribution on surface of RhNPs@SBA-15Imz[NTf2] by XPS

| Name        | Peak BE       | Atomic %    | Wt. %       |
|-------------|---------------|-------------|-------------|
| O1s         | 532.95        | 40.07       | 31.8        |
| <b>Rh3d</b> | <b>307.93</b> | <b>2.24</b> | <b>11.4</b> |
| F1s         | 689.03        | 8.26        | 7.8         |
| Si2p        | 103.38        | 18.56       | 25.9        |
| C1s         | 286.13        | 20.86       | 12.4        |
| N1s         | 401.82        | 6.17        | 4.3         |
| S2p         | 169.23        | 2.59        | 4.1         |
| Cl2p        | 198.3         | 1.25        | 2.2         |

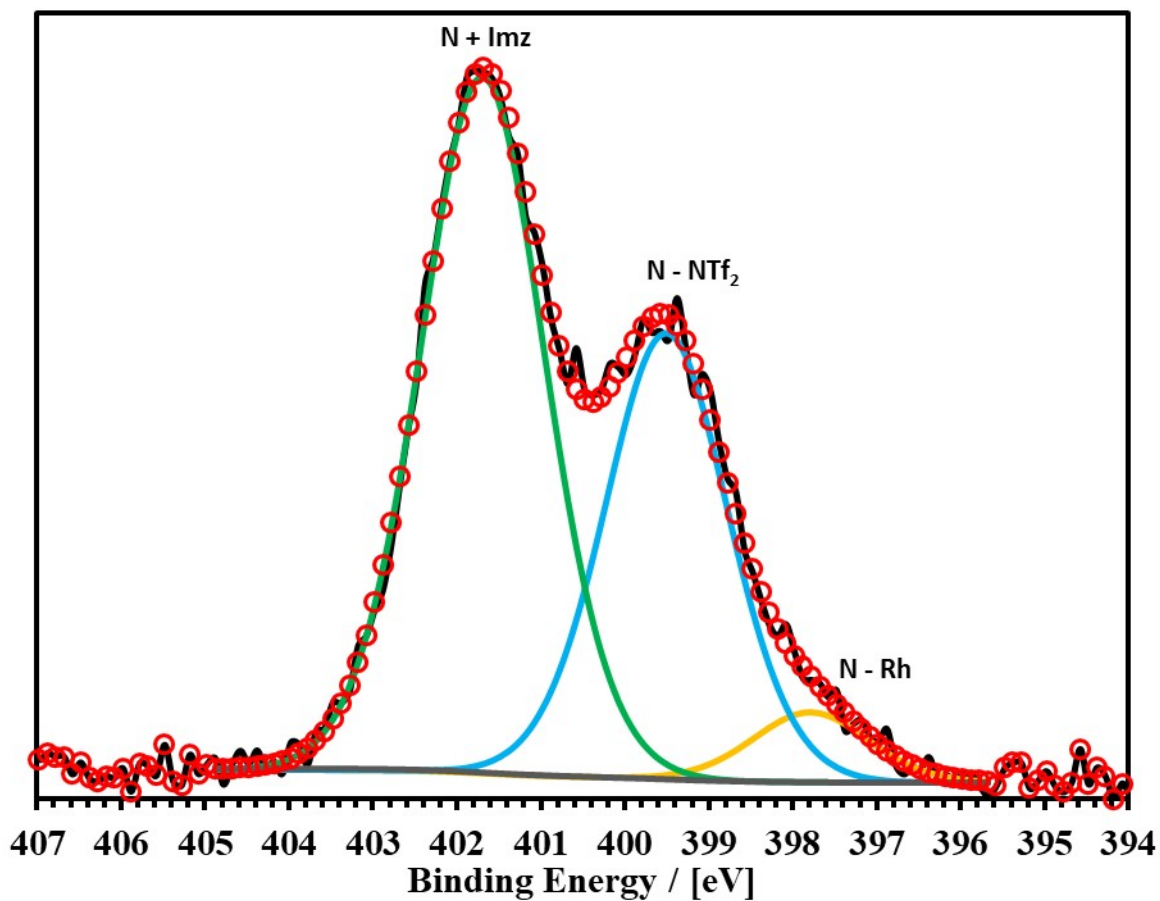

**Figure S18.** High resolution -XPS of N 1s in RhNPs@SBA-15Imz[NTf<sub>2</sub>]

**Table S4** Nitrogen species distribution on surface of RhNPs@SBA-15Imz[NTf<sub>2</sub>] by XPS

| Name                               | Peak BE | Atomic % |
|------------------------------------|---------|----------|
| N <sup>*</sup> -Rh                 | 397.83  | 5.42     |
| N <sup>-</sup> (NTf <sub>2</sub> ) | 399.09  | 36.65    |
| N <sup>+</sup> (Imz)               | 401.28  | 57.93    |



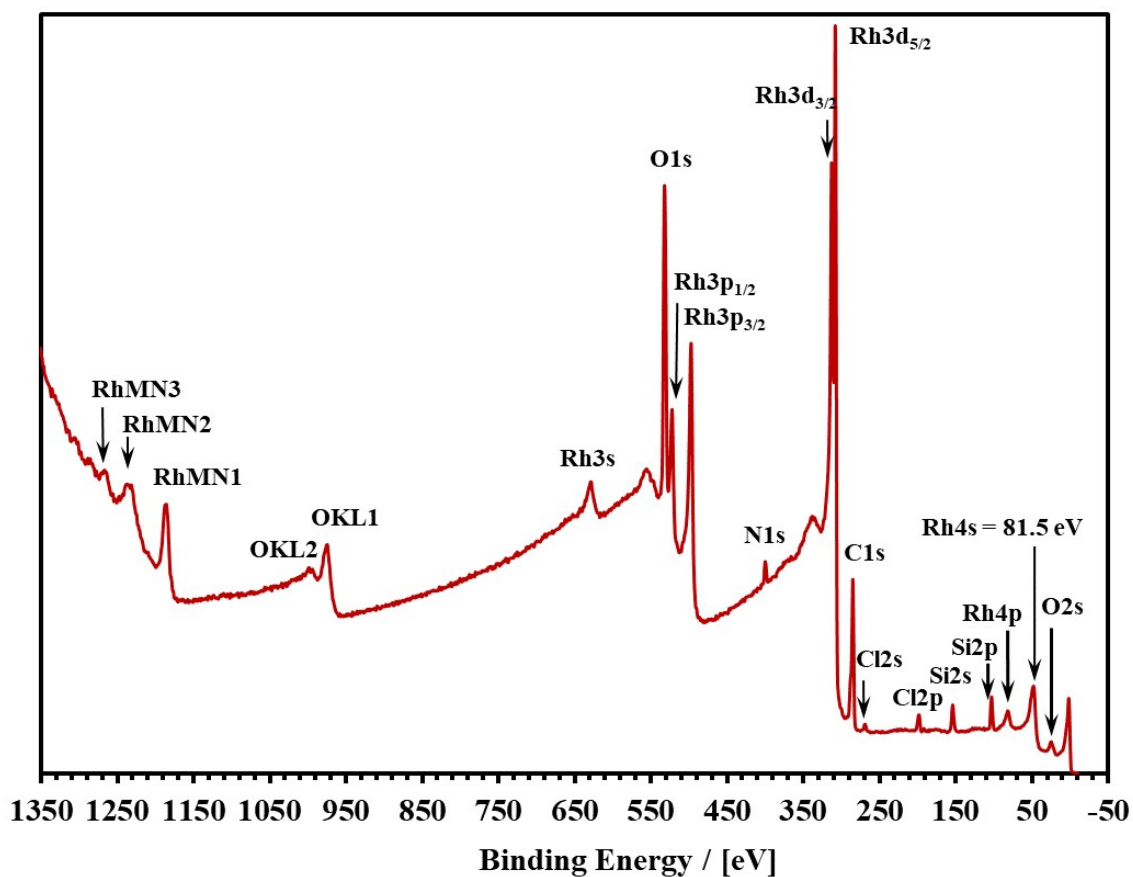

**Figure S19.** XPS survey of RhNPs@SBA-15NIC

**Table S5** Element distribution on surface of RhNPs@SBA-15NIC by XPS

| Name | Peak BE | Atomic % | Wt. % |
|------|---------|----------|-------|
| Rh3d | 308.14  | 14.99    | 53.78 |
| O1s  | 531.81  | 36.12    | 20.15 |
| C1s  | 285.2   | 36.18    | 15.15 |
| Si2p | 103.17  | 6.87     | 6.73  |
| N1s  | 399.91  | 4.03     | 1.97  |
| Cl2p | 198.56  | 1.81     | 2.24  |

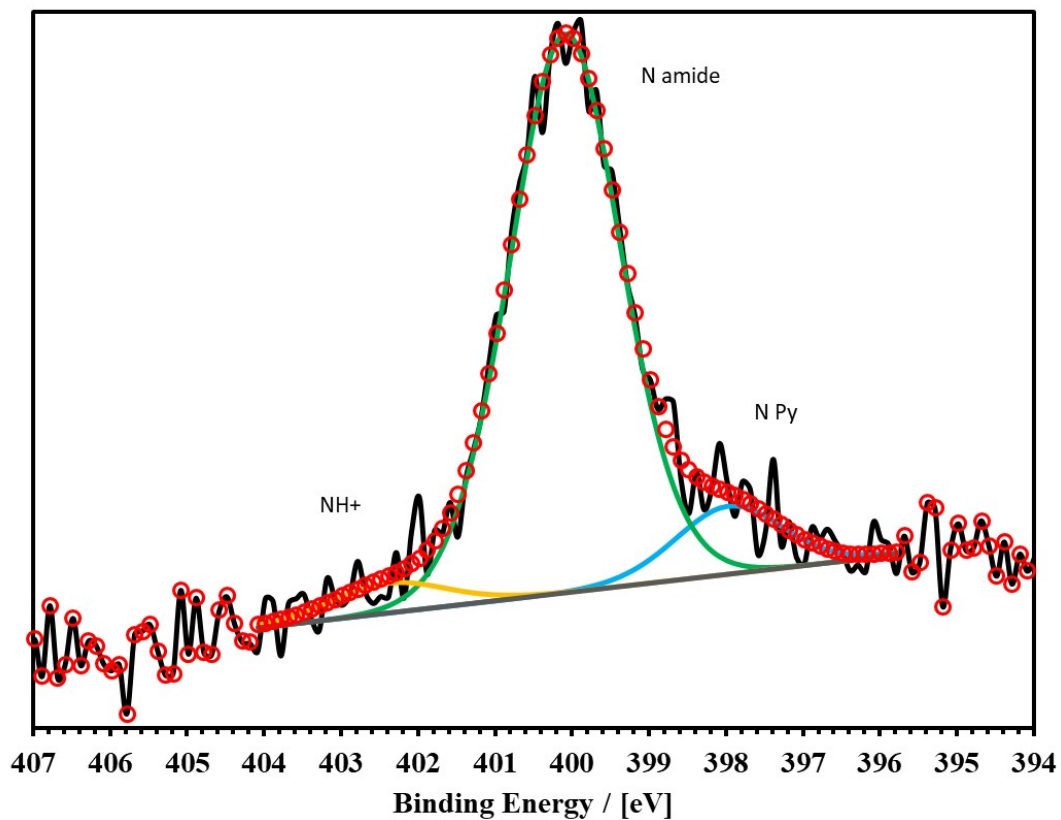

**Figure S20.** High resolution -XPS of N 1s in RhNPs@SBA-15NIC

**Table S6** Nitrogen species distribution on surface of RhNPs@SBA-15NIC by XPS

| Name       | Peak BE | Atomic % |
|------------|---------|----------|
| N Pyridine | 397.96  | 10.1     |
| N amide    | 400.09  | 85.21    |
| NH +       | 402.39  | 4.69     |

### J. Calculation of specific surface area and metal Dispersion.

For the calculation of the dispersion (D) of the RhNPs, we assume nanoparticles as spheres; let NS be the total number of metal atoms present on the surface and NT the total number of metal atoms (surface and bulk). The metal dispersion D is given by

$$D = NS/NT \text{ (eq. 1)}$$

Taking in account the relationship between specific surface area ( $S_{sp}$ ) and dispersion (D) is

$$S_{sp} = a_m (N_A/M)D \text{ (eq. 2)}$$

Where  $a_m$  is the surface area occupied by an atom (Rh) on a polycrystalline surface,  $N_A$  is Avogadro's number ( $6.022 \times 10^{23} \text{ mol}^{-1}$ ) and M is the atomic mass of the metal.

And the definition of  $v_m$  (the volume occupied by an atom (Rh) in the bulk of metal) given by:

$$v_m = M/\rho N_A \text{ (eq. 3)}$$

where  $\rho$  the mass density

It possible to rewrite the D in terms of  $a_m$ ,  $v_m$  and  $d_{NP}$ .<sup>1,2</sup> and rewrites as follows:

$$D = [6(v_m/a_m)]/d_{NP} \text{ (eq. 4)}$$

Where  $d_{NP}$  is the mean diameter of nanoparticles.

For Rh (FCC)  $a_m = 7.58 \text{ \AA}^2$ ,  $v_m = 13.78 \text{ \AA}^3$ ,  $\rho = 12.4 \text{ g cm}^{-3}$ ,

$$D(\text{RhNPs@SBA-15Imz[NTf}_2]) = [6*(13.78 \text{ \AA}^3/7.58 \text{ \AA}^2)]/ 27 \text{ \AA} = \mathbf{0.404 (40.4 \%)}$$

$$S_{sp}(\text{RhNPs@SBA-15Imz[NTf}_2]) = 7.58 \times 10^{-20} \text{ m}^2 (N_A/102.905) = 443.6 * D = \mathbf{179 \text{ m}^2 \text{ g}^{-1}}$$

$$D(\text{RhNPs@SBA-15NIC}) = [6*(13.78 \text{ \AA}^3/7.58 \text{ \AA}^2)]/ 17 \text{ \AA} = \mathbf{0.642 (64.2 \%)}$$

$$S_{sp}(\text{RhNPs@SBA-15Imz[NTf}_2]) = 7.58 \times 10^{-20} \text{ m}^2 (N_A/102.905 \text{ g mol}^{-1}) = 443.6 * D = \mathbf{285 \text{ m}^2 \text{ g}^{-1}}$$

## K. Selected catalytic Reactions.

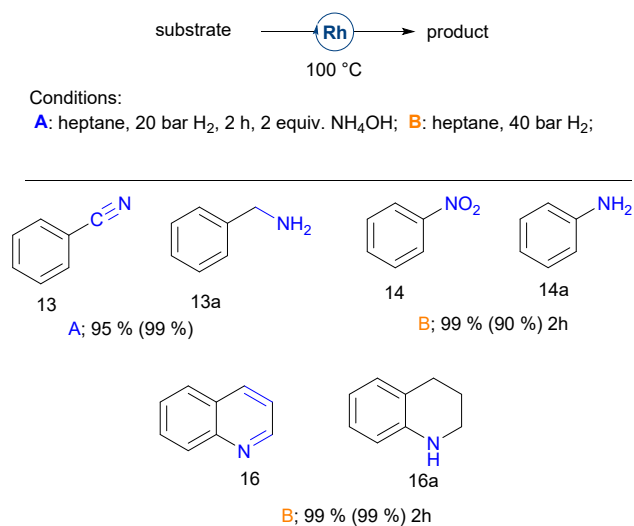

Reaction conditions: 2 mmol of substrate, 5 mg RhNPs@SBA-15-NIC  
 0.25 mol% , 100 °C. Conversion % (Selectivity %)

**Figure S21.** RhNPs@SBA-15NIC hydrogenation of different functional groups.

**Table S7.** Rh-catalyzed hydrogenation of Levulinic Acid.

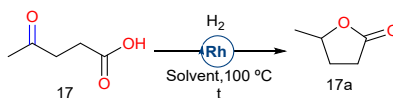

| Entry | Catalyst                            | Solvent | Time (h) | H <sub>2</sub> (bar) | Conv.% <sup>a</sup> | Yield 17a% <sup>a</sup> | TON <sup>b</sup> |
|-------|-------------------------------------|---------|----------|----------------------|---------------------|-------------------------|------------------|
| 1     | RhNPs@SBA-15-NIC                    | Dioxane | 2h       | 5                    | <1                  | n.d.                    | n.d.             |
| 2     |                                     | 2-MeTHF |          | 5                    | n.d.                | n.d.                    |                  |
| 3     |                                     | Heptane |          | 5                    | n.d.                | n.d.                    |                  |
| 4     |                                     | Heptane | 4        | 40                   | <1                  | n.d.                    | n.d.             |
| 5     |                                     | Neat    |          | 40                   | <b>15</b>           | <b>12</b>               | <b>96</b>        |
| 6     | RhNPs@SBA-15-Imz[NTf <sub>2</sub> ] | Dioxane | 2h       | 5                    | <1                  | n.d.                    | n.d.             |
| 7     |                                     | 2-MeTHF |          | 18                   | 9                   | 72                      |                  |
| 8     |                                     | Heptane |          | 7                    | n.d.                | n.d.                    |                  |
| 9     |                                     | Heptane | 4        | 40                   | <1                  | n.d.                    | n.d.             |
| 10    |                                     | Neat    |          | 40                   | <b>42</b>           | <b>42</b>               | <b>336</b>       |

Reaction conditions: Levulinic acid (203 μL, 2 mmol), 2 mL of solvent, 5 mg of catalyst, 100 °C.

Table S8. Rh-catalyzed hydrogenation of Furfural.

| Entry | Catalyst                            | Solvent          | Time (h) | H <sub>2</sub> (bar) | Conv.% <sup>a</sup> | Yield 17a% <sup>a</sup> | TON <sup>b</sup> |      |
|-------|-------------------------------------|------------------|----------|----------------------|---------------------|-------------------------|------------------|------|
| 1     | RhNPs@SBA-15-Imz[NTf <sub>2</sub> ] | Heptane          | 4        | 5                    | <1                  | n.d.                    | n.d.             |      |
| 2     |                                     |                  |          | 40                   | <1                  | n.d.                    | n.d.             |      |
| 3     |                                     | EtOH             | 4        | 5                    | 25                  | 77                      | 154              |      |
| 4     |                                     |                  |          | 40                   | 30                  | 57                      | 137              |      |
| 5     |                                     | RhNPs@SBA-15-NIC | MeOH     | 2                    | 40                  | 30                      | 65               | 156  |
| 6     |                                     |                  | Dioxane  | 4                    |                     | 19                      | 44               | 67   |
| 7     |                                     |                  | Neat     | 6                    |                     | 32                      | 78               | 200  |
| 8     |                                     |                  |          |                      |                     | 47                      | 62               | 233  |
| 9     |                                     |                  | Heptane  | 4                    |                     | <1                      | n.d.             | n.d. |
| 10    |                                     |                  | MeOH     | 2                    |                     | 32                      | 60               | 154  |
| 11    |                                     | Dioxane          | 4        | 27                   | 16                  | 37                      |                  |      |
| 12    |                                     | Neat             | 4        | 44                   | 56                  | 197                     |                  |      |

Reaction conditions: Furfural (166  $\mu$ L, 2 mmol), 2 mL of solvent, 5 mg of catalyst, 100  $^{\circ}$ C.

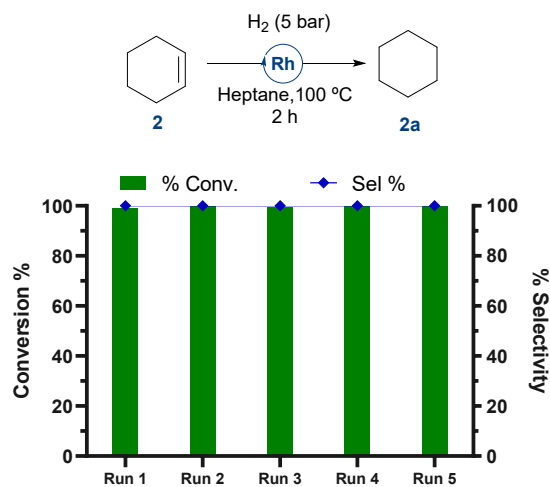

Scheme S1. Recycling experiments of RhNPs@SBA-15-Imz[NTf<sub>2</sub>] on cyclohexene hydrogenation.

## L. NMR Data of catalytic products

### 4-cyclohexylmorpholine: <sup>3</sup>

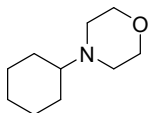

<sup>1</sup>H NMR (600 MHz, CDCl<sub>3</sub>) δ 3.79 – 3.71 (m, 4H), 2.67 – 2.55 (m, 4H), 2.29 – 2.17 (m, 1H), 1.96 – 1.74 (m, 4H), 1.37 – 1.13 (m, 6H). <sup>13</sup>C NMR (151 MHz, CDCl<sub>3</sub>) δ 66.90, 63.93, 49.44, 28.45, 26.09, 25.66.

### Ethylbenzene:

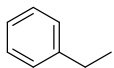

<sup>1</sup>H NMR (600 MHz, CDCl<sub>3</sub>) δ: 7.35 – 7.25 (m, 3H, Ar-H), 7.26 – 7.15 (m, 1H, Ar-H), 2.67 (q, *J* = 7.6 Hz, 2H, -CH<sub>2</sub>-), 1.26 (t, *J* = 7.6 Hz, 3H, -CH<sub>3</sub>).

### Pinane: <sup>4</sup>

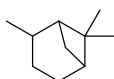

Mixture of Cis and Trans, <sup>1</sup>H NMR (600 MHz, CDCl<sub>3</sub>) δ: 2.38 (q, *J* = 7.2 Hz, 2H), 2.20 (q, *J* = 8.1 Hz, 2H), 2.16 – 1.64 (m, 13H), 1.56 – 1.43 (m, 2H), 1.26 (d, *J* = 4.1 Hz, 9H), 1.08 (d, *J* = 12.0 Hz, 13H), 0.96 – 0.87 (m, 5H). <sup>13</sup>C NMR (151 MHz, CDCl<sub>3</sub>) δ: 48.24, 47.79, 41.51, 41.03, 39.56, 38.90, 36.11, 35.57, 34.08, 29.48, 28.38, 26.91, 26.65, 24.72, 24.07, 23.97, 23.27, 23.14, 22.96, 21.65, 20.13.

### 5-propylbenzo[d][1,3]dioxole:

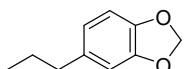

<sup>1</sup>H NMR (600 MHz, CDCl<sub>3</sub>) δ: 6.83 – 6.69 (m, 2H), 6.69 – 6.61 (m, 1H), 5.93 (d, *J* = 1.1 Hz, 2H), 2.54 (t, *J* = 7.7 Hz, 2H), 1.67 – 1.60 (m, 2H), 0.97 (td, *J* = 7.3, 2.6 Hz, 3H). <sup>13</sup>C NMR (151 MHz, CDCl<sub>3</sub>) δ: 147.59, 145.57, 136.65, 121.21, 109.00, 108.10, 100.77, 37.90, 24.93, 13.80.

### 1-methoxy-4-propylbenzene:

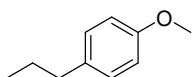

<sup>1</sup>H NMR (600 MHz, CDCl<sub>3</sub>) δ: 7.18 – 7.10 (m, 2H), 6.94 – 6.84 (m, 2H), 3.83 (s, 4H), 2.63 – 2.54 (m, 2H), 1.67 (h, *J* = 7.4 Hz, 2H), 0.99 (t, *J* = 7.4 Hz, 3H). <sup>13</sup>C NMR (151 MHz, CDCl<sub>3</sub>) δ: 157.78, 134.91, 129.42, 113.75, 55.31, 37.27, 24.92, 13.89.

### 2-methoxy-4-propylphenol:

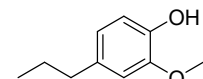

<sup>1</sup>H NMR (600 MHz, CDCl<sub>3</sub>) δ: 6.96 (d, *J* = 7.9 Hz, 1H), 6.82 – 6.74 (m, 2H), 5.91 (s, 1H), 3.90 (s, 3H), 2.65 – 2.60 (m, 2H), 1.73 (h, *J* = 7.4 Hz, 2H), 1.05 (t, *J* = 7.4 Hz, 3H). <sup>13</sup>C NMR (151 MHz, CDCl<sub>3</sub>) δ: 146.38, 143.57, 134.58, 120.93, 114.23, 111.10, 55.70, 37.70, 24.82, 13.71.

### 2,6-dimethyloctane:

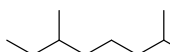

<sup>1</sup>H NMR (600 MHz, CDCl<sub>3</sub>) δ: 1.58 – 1.48 (m, 1H), 1.42 – 1.19 (m, 5H), 1.19 – 1.03 (m, 4H), 0.90 – 0.83 (m, 12H). <sup>13</sup>C NMR (151 MHz, CDCl<sub>3</sub>) δ: 39.57, 37.07, 34.62, 29.71, 28.17, 25.02, 22.88, 22.79, 19.39, 11.58.

**Stearic acid:**<sup>5</sup>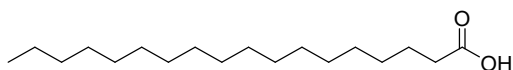

<sup>1</sup>H NMR (600 MHz, CDCl<sub>3</sub>) δ: 11.69 (s, 1H), 2.34 (t, *J* = 7.6 Hz, 2H), 1.63 (p, *J* = 7.5 Hz, 2H), 1.26 (s, 26H), 0.88 (t, *J* = 7.0 Hz, 3H). <sup>13</sup>C NMR (151 MHz, CDCl<sub>3</sub>) δ: 180.62, 34.26, 32.09, 29.86, 29.85, 29.83, 29.80, 29.75, 29.59, 29.52, 29.40, 29.22, 24.83, 22.85, 14.26.

**Squalane:**<sup>5</sup>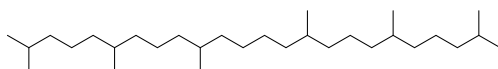

<sup>1</sup>H NMR (600 MHz, CDCl<sub>3</sub>) δ: 1.65 – 1.51 (m, 3H), 1.52 – 1.24 (m, 25H), 1.25 – 1.06 (m, 12H), 0.99-0.82 (m, 24H). <sup>13</sup>C NMR (151 MHz, CDCl<sub>3</sub>) δ: 39.73, 37.82, 37.79, 37.77, 37.75, 37.66, 33.13, 33.10, 28.30, 27.80, 27.79, 25.17, 25.16, 24.82, 23.04, 22.94, 20.09, 20.06, 20.02, 20.00.

**Benzylamine:**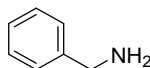

<sup>1</sup>H NMR (600 MHz, CDCl<sub>3</sub>) δ: 7.31 – 7.17 (m, 5H), 3.77 (s, 2H), 1.39 (s, 2H). <sup>13</sup>C NMR (151 MHz, CDCl<sub>3</sub>) δ: 143.07, 128.13, 126.70, 126.35, 46.10.

**Aniline:**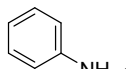

<sup>1</sup>H NMR (600 MHz, CDCl<sub>3</sub>) δ: 7.36 – 7.23 (m, 2H), 6.89 (t, *J* = 7.4 Hz, 1H), 6.82 – 6.68 (m, 2H), 3.68 (s, 2H). <sup>13</sup>C NMR (151 MHz, CDCl<sub>3</sub>) δ: 146.42, 129.17, 118.31, 114.99.

**Methylcyclohexane:**<sup>6</sup>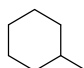

<sup>1</sup>H NMR (600 MHz, CDCl<sub>3</sub>) δ: 1.78 – 1.57 (m, 6H), 1.41 – 1.30 (m, 1H), 1.30 – 1.19 (m, 2H), 1.20 – 1.08 (m, 1H), 0.88 (d, *J* = 6.8 Hz, 3H). <sup>13</sup>C NMR (151 MHz, CDCl<sub>3</sub>) δ: 35.66, 32.97, 26.67, 26.55, 23.05.

**1,2,3,4-tetrahydroquinoline:**<sup>7</sup>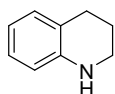

<sup>1</sup>H NMR (600 MHz, CDCl<sub>3</sub>) δ: 7.01 – 6.95 (m, 2H), 6.68 – 6.59 (m, 1H), 6.53 – 6.45 (m, 1H), 3.35 – 3.26 (m, 3H), 2.79 (t, *J* = 6.4 Hz, 2H), 2.00 – 1.92 (m, 2H). <sup>13</sup>C NMR (151 MHz, CDCl<sub>3</sub>) δ: 144.88, 129.61, 126.82, 121.56, 117.05, 114.30, 42.08, 27.07, 22.28.

**Gamma-valerolactone:**<sup>5</sup>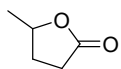

<sup>1</sup>H NMR (600 MHz, CDCl<sub>3</sub>) δ: 4.50 – 4.39 (m, 1H), 2.32 (dd, *J* = 10.2, 7.2 Hz, 2H), 2.23 – 2.10 (m, 1H), 1.69 – 1.58 (m, 1H), 1.20 – 1.16 (m, 3H). <sup>13</sup>C NMR (151 MHz, CDCl<sub>3</sub>) δ: 176.89, 76.84, 29.19, 28.60, 20.53.

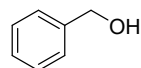

phenylmethanol <sup>1</sup>H NMR (600 MHz, CDCl<sub>3</sub>) δ: 7.51 – 7.29 (m, 5H), 4.59 (s, 2H), 4.18 (s, 1H). <sup>13</sup>C NMR (151 MHz, CDCl<sub>3</sub>) δ: 140.79, 128.25, 127.23, 126.85, 64.44.

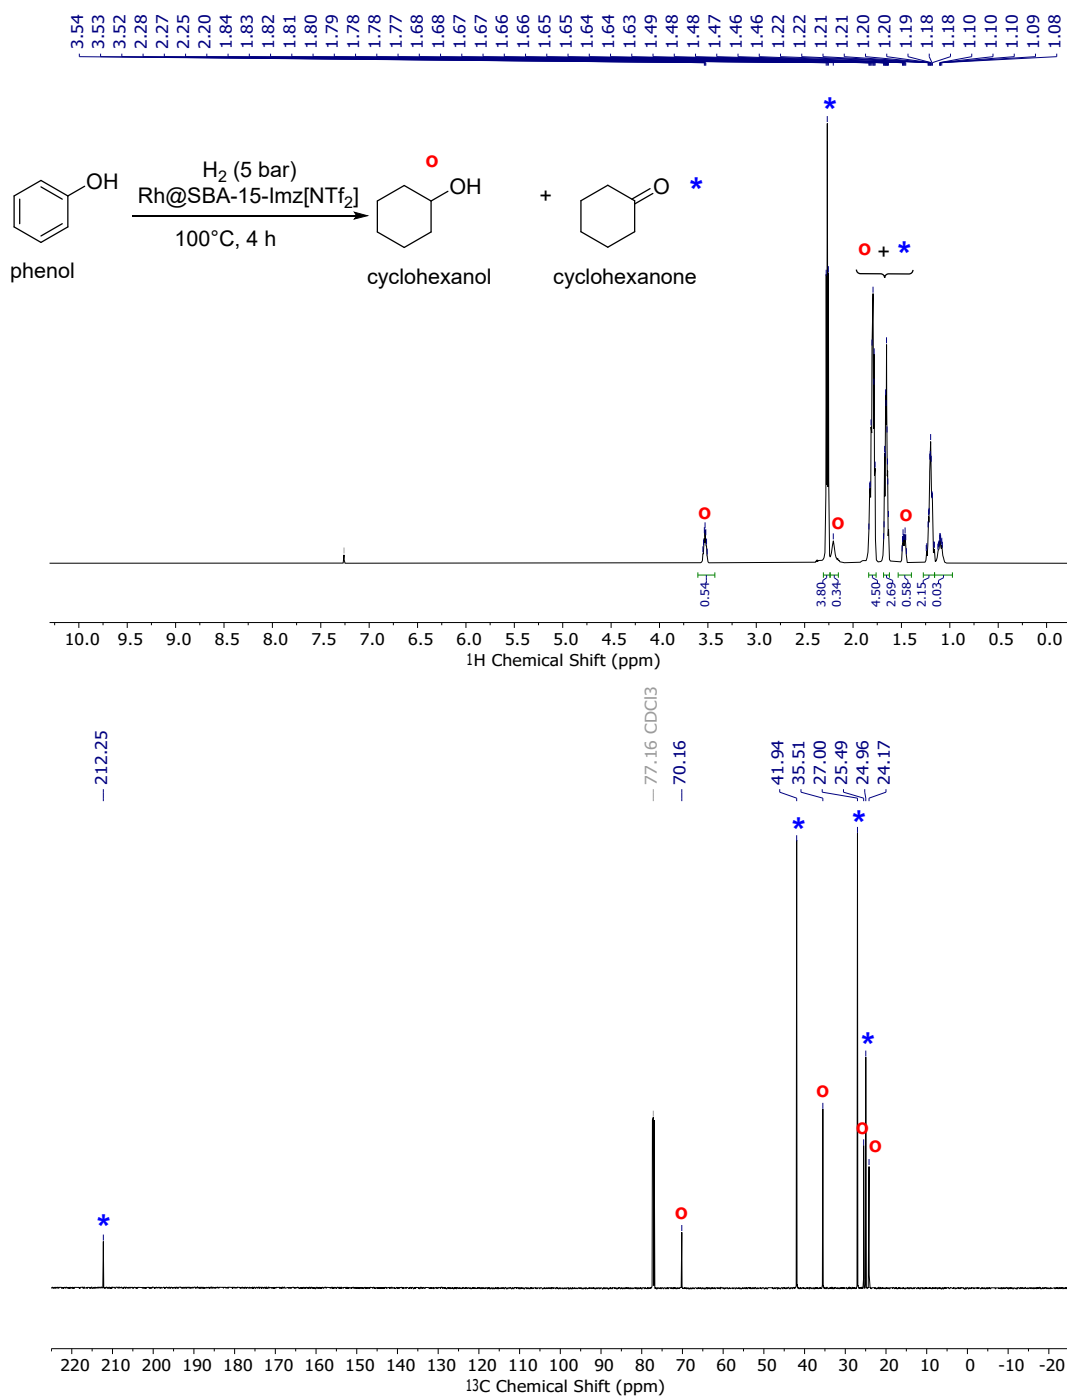



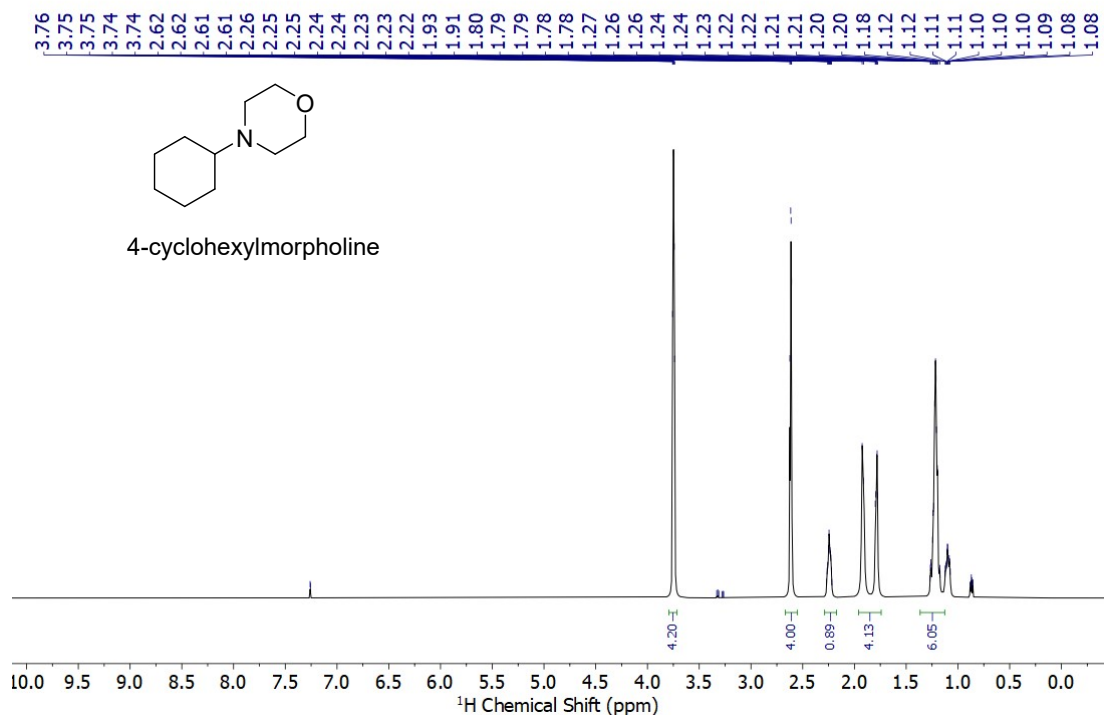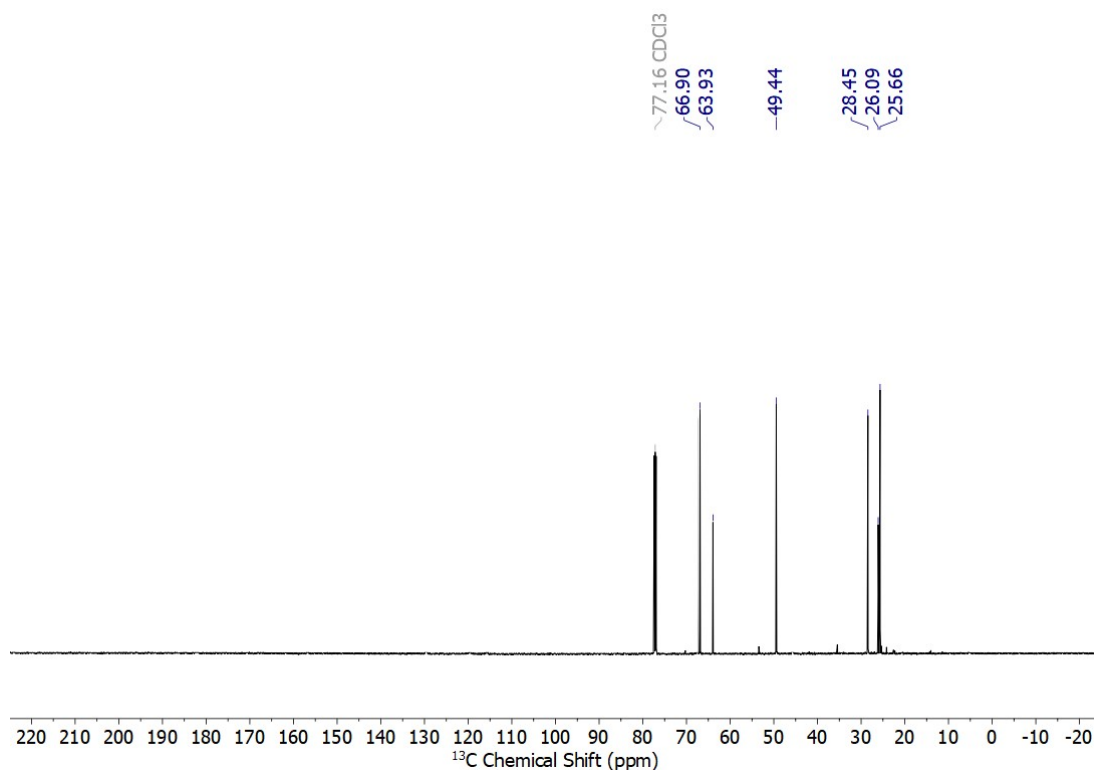

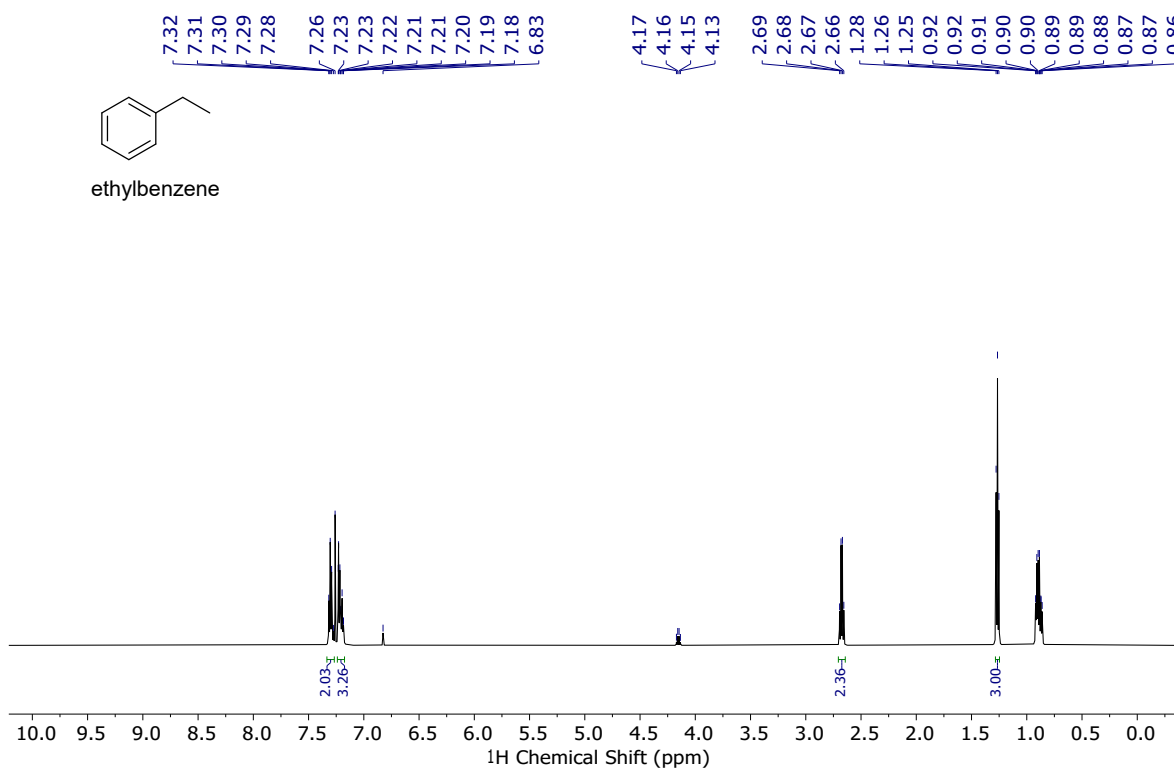

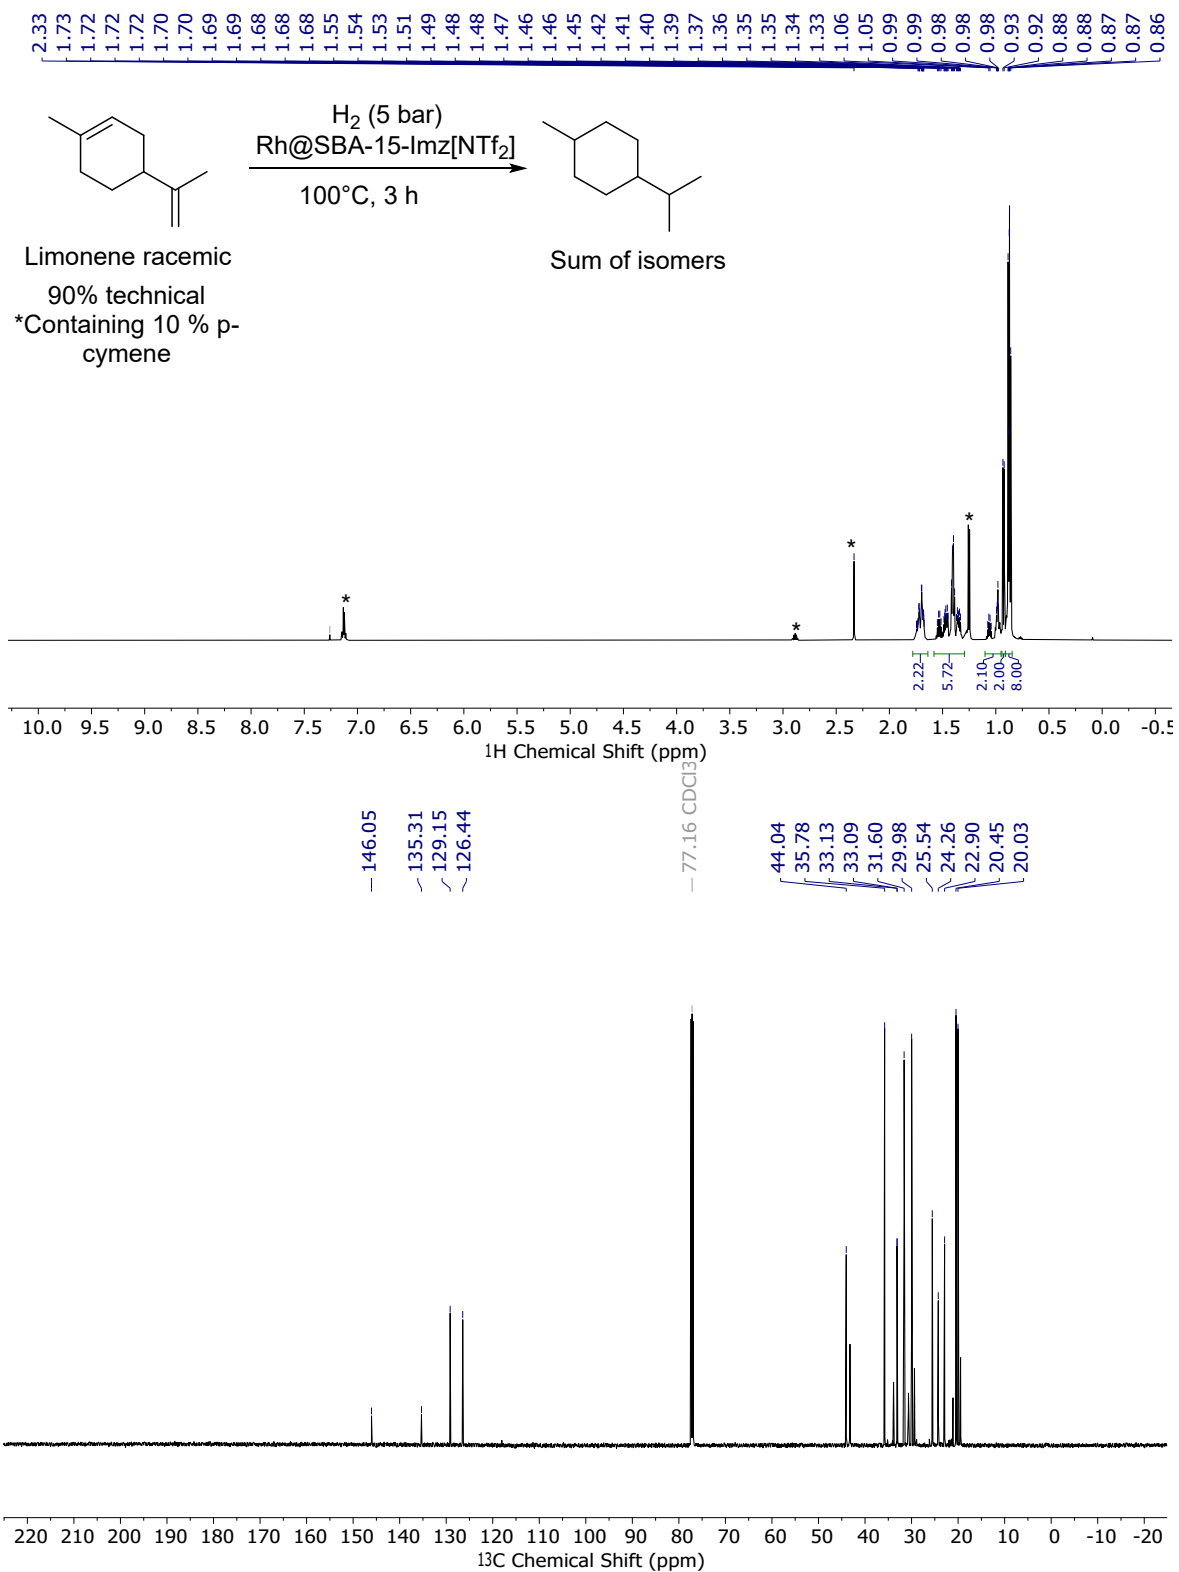

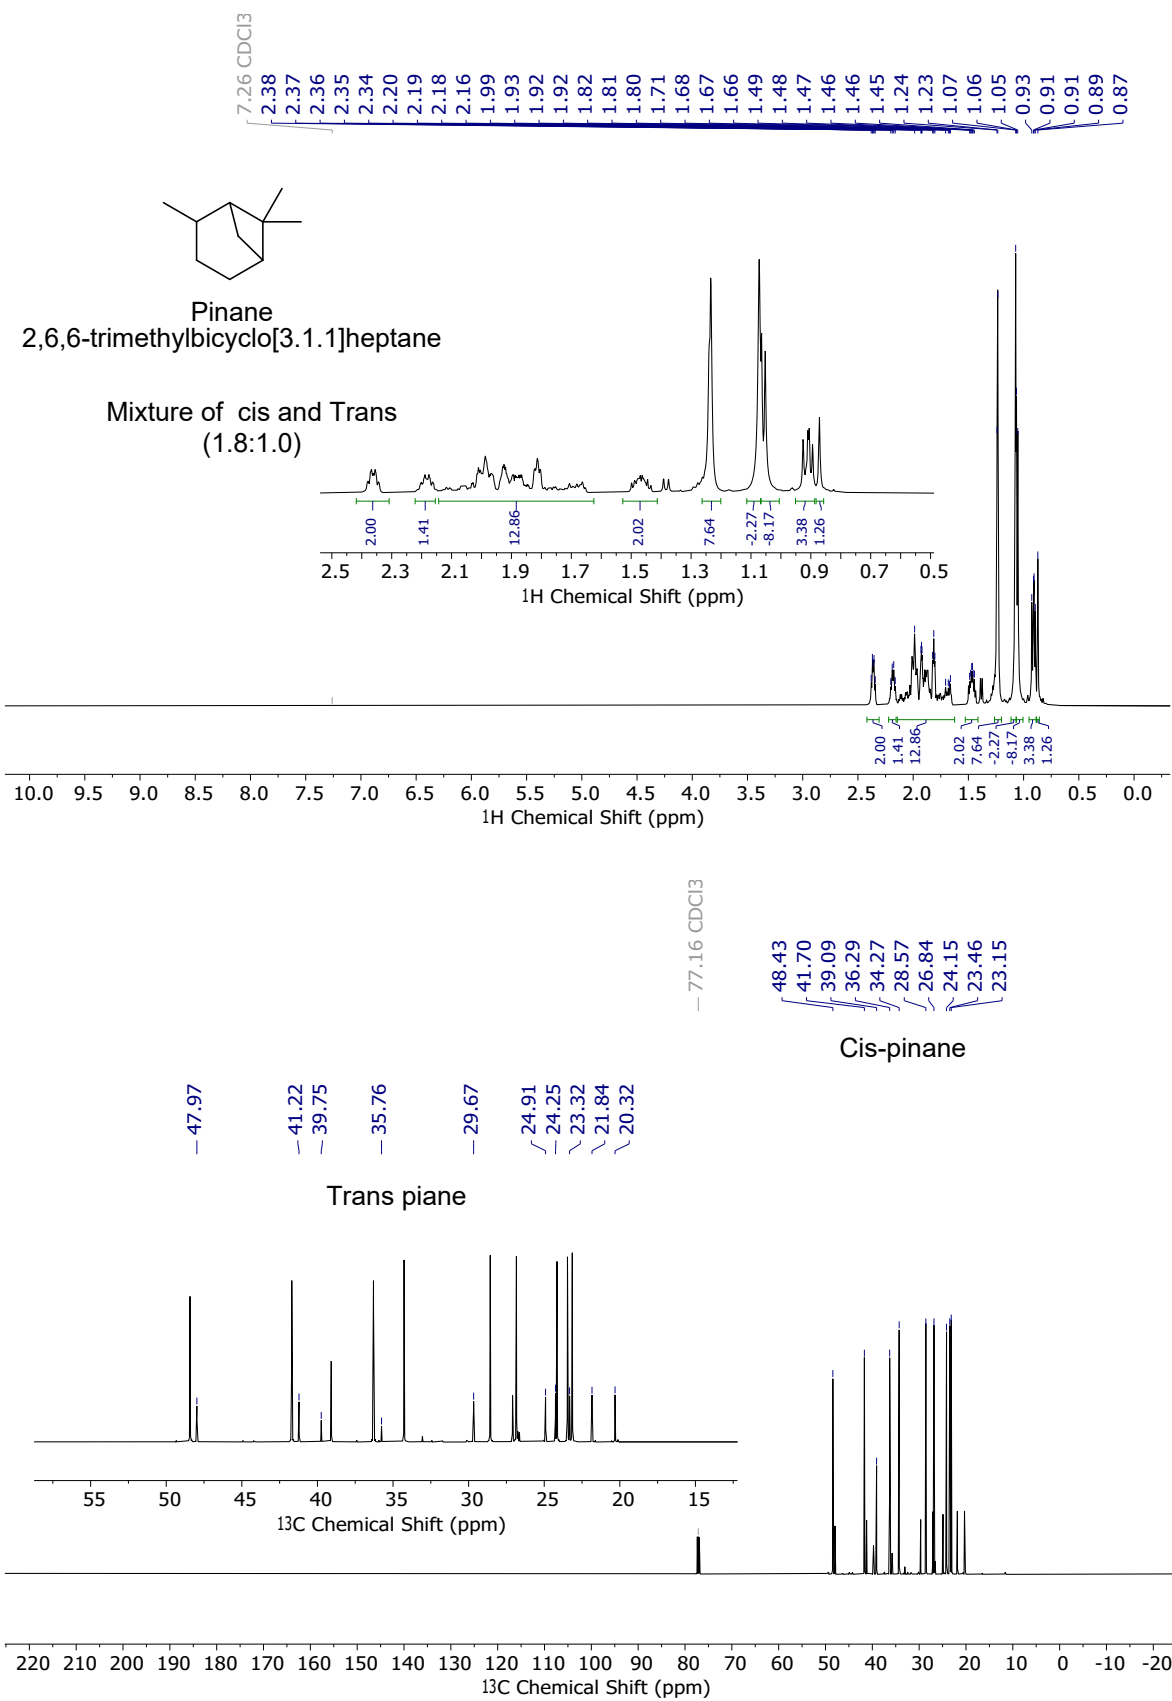

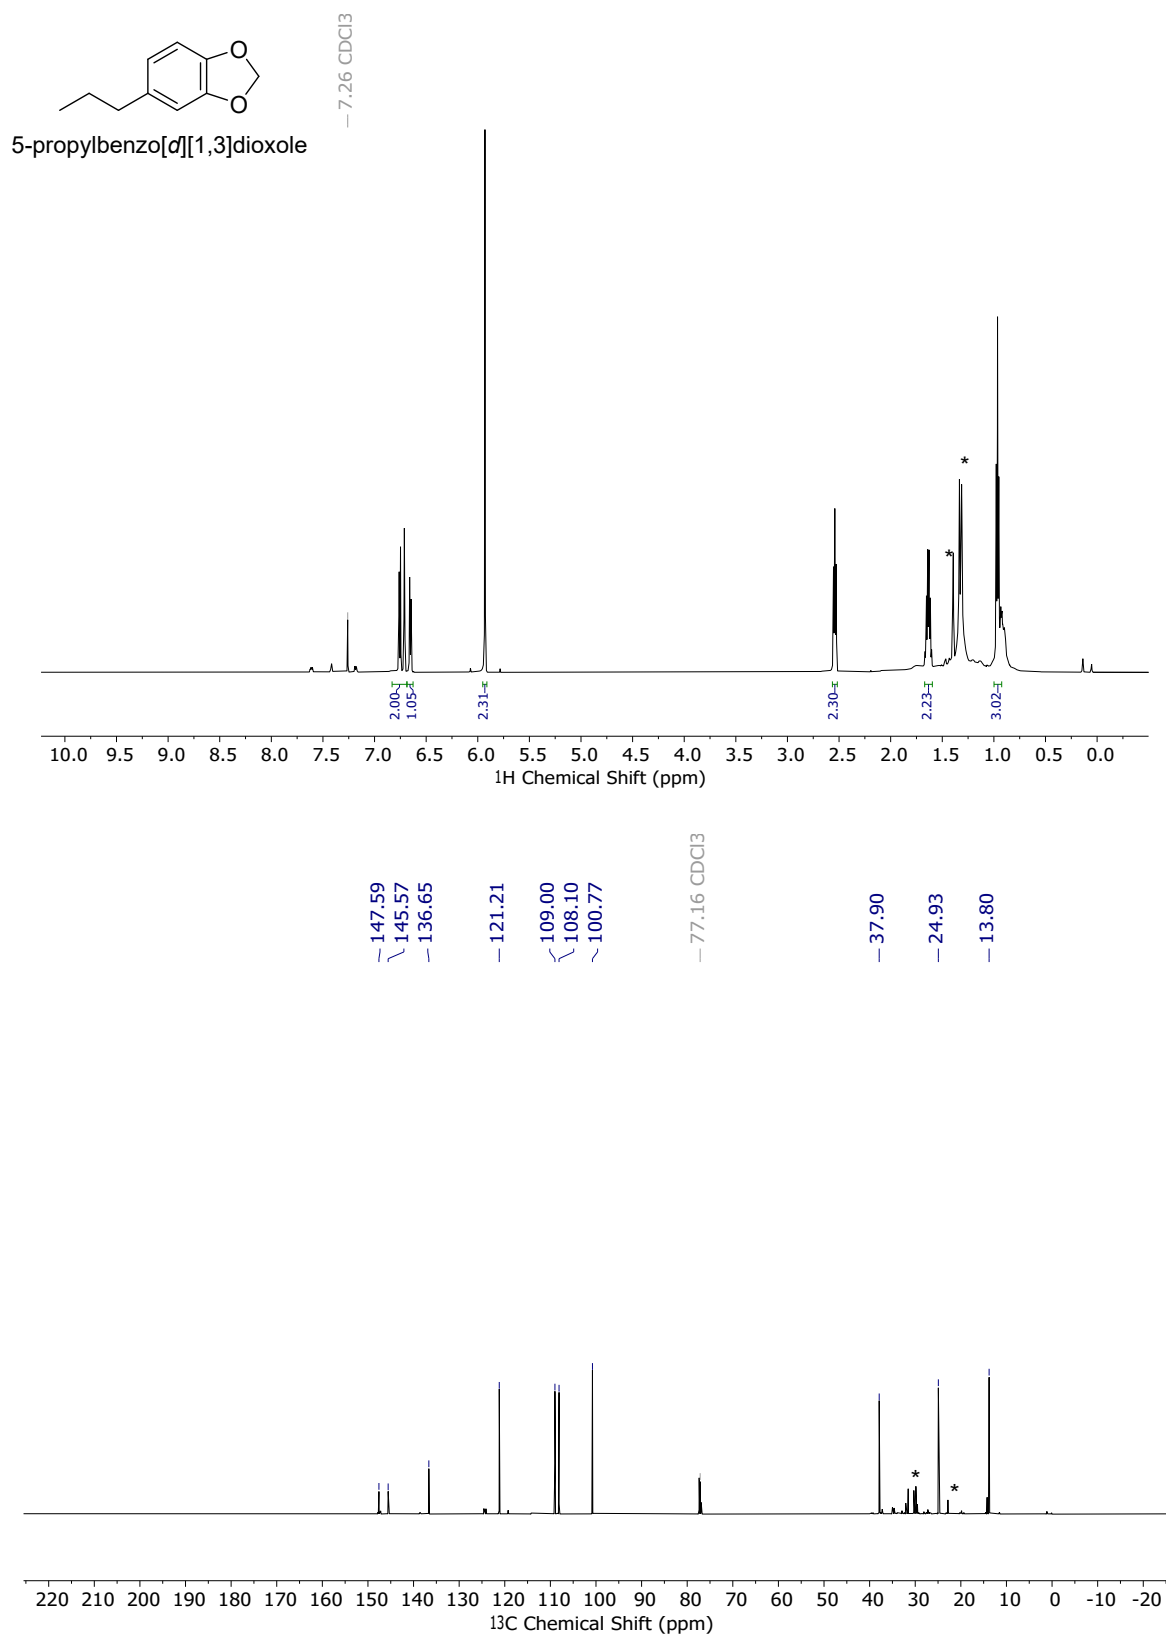

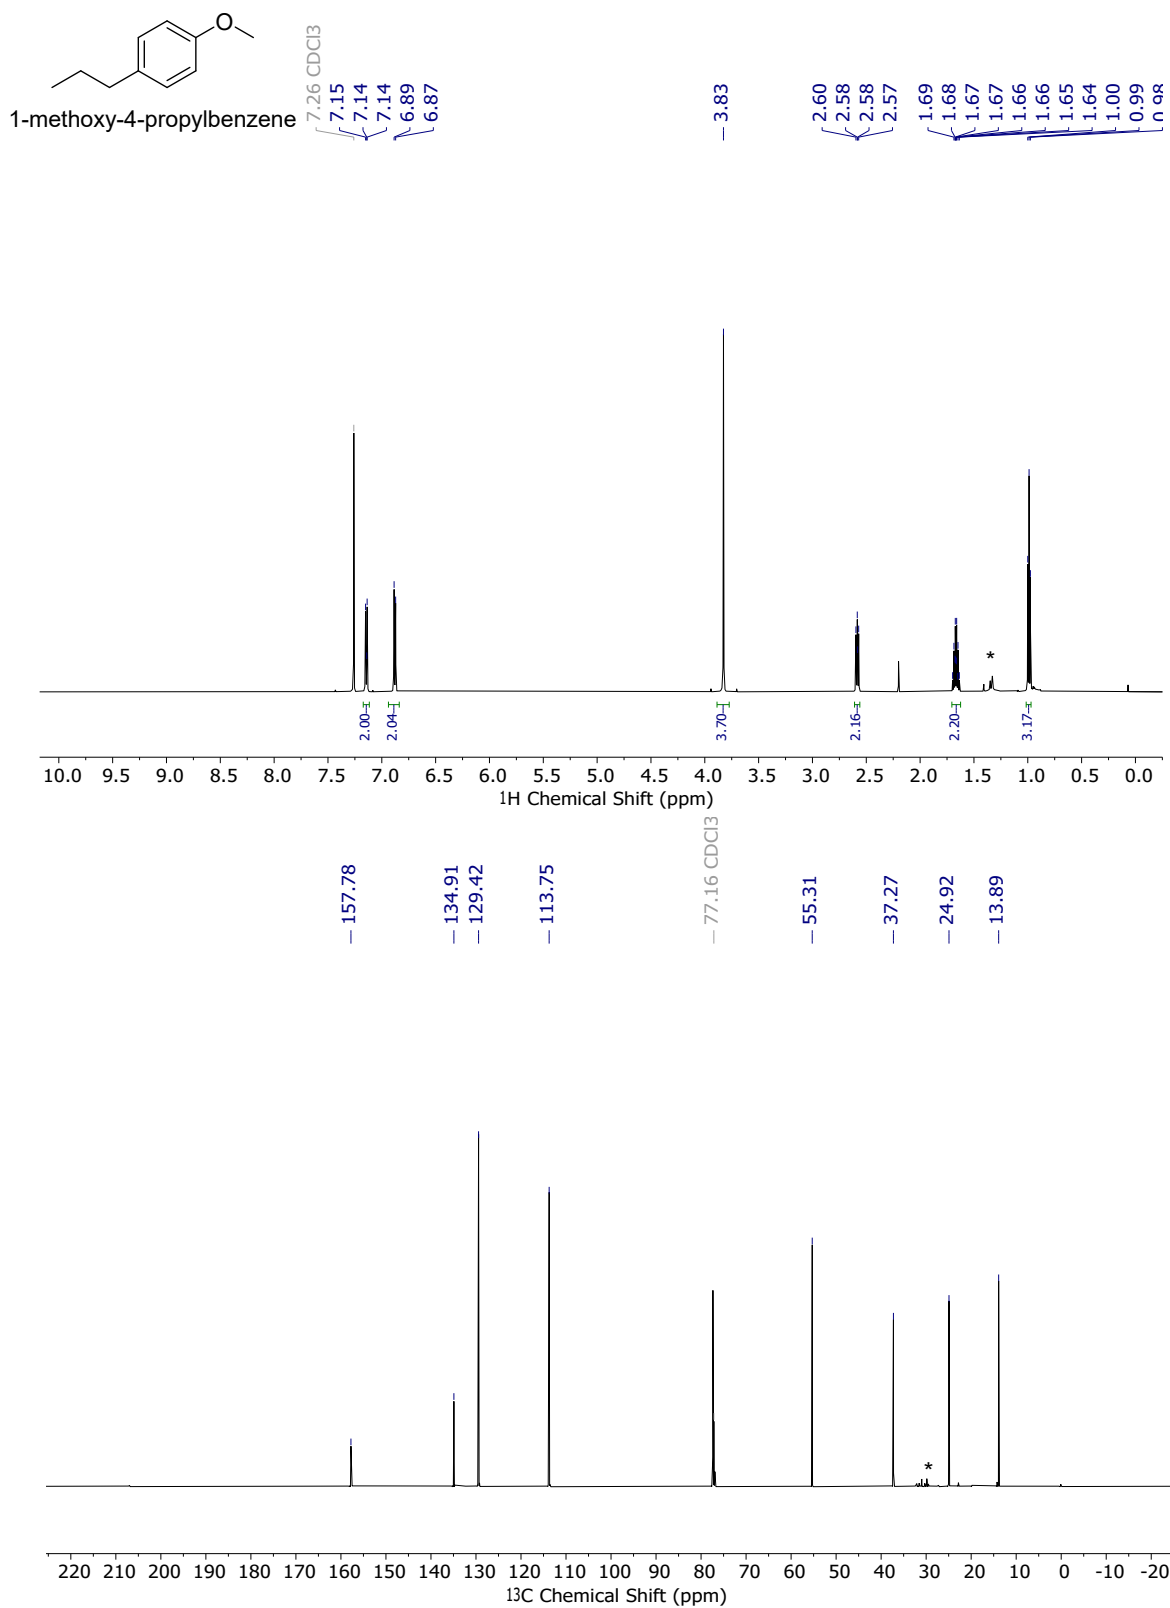

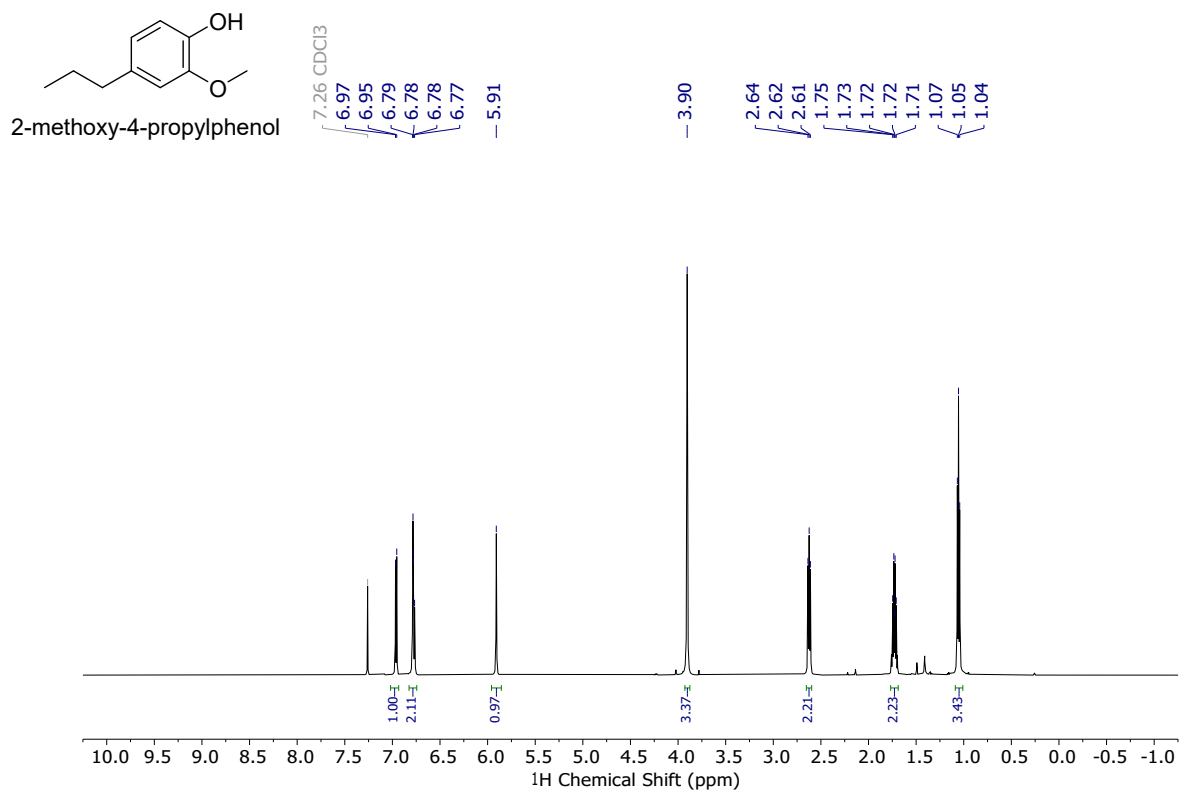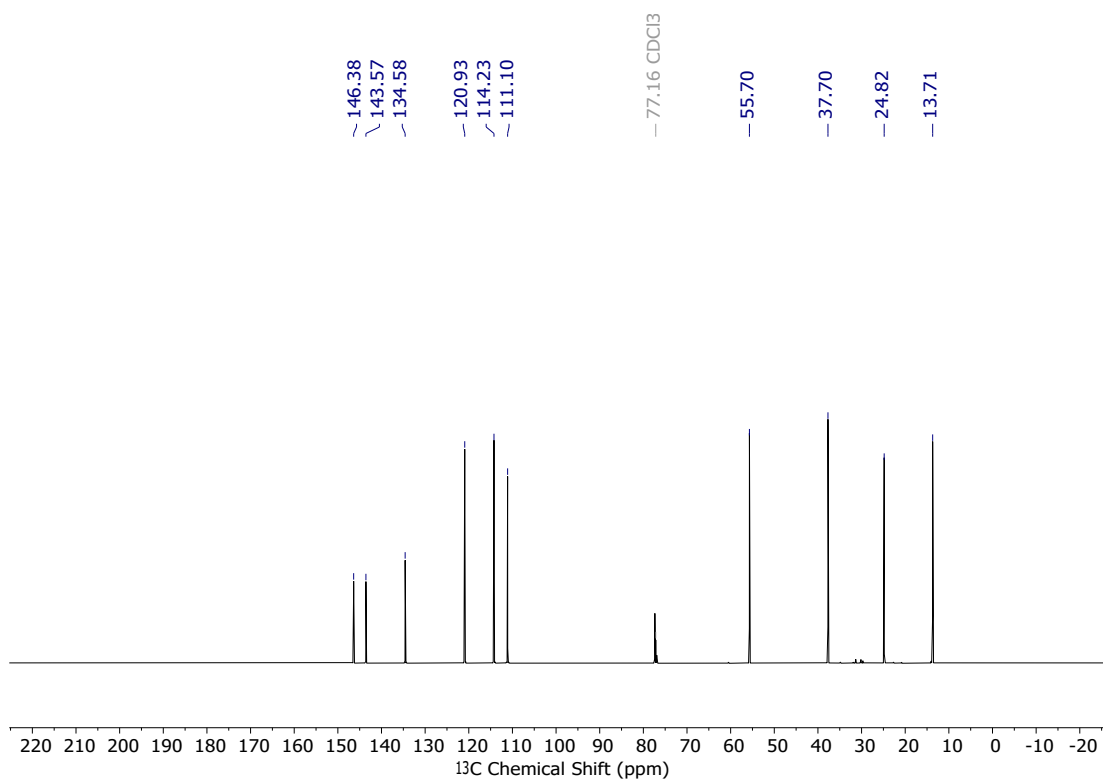

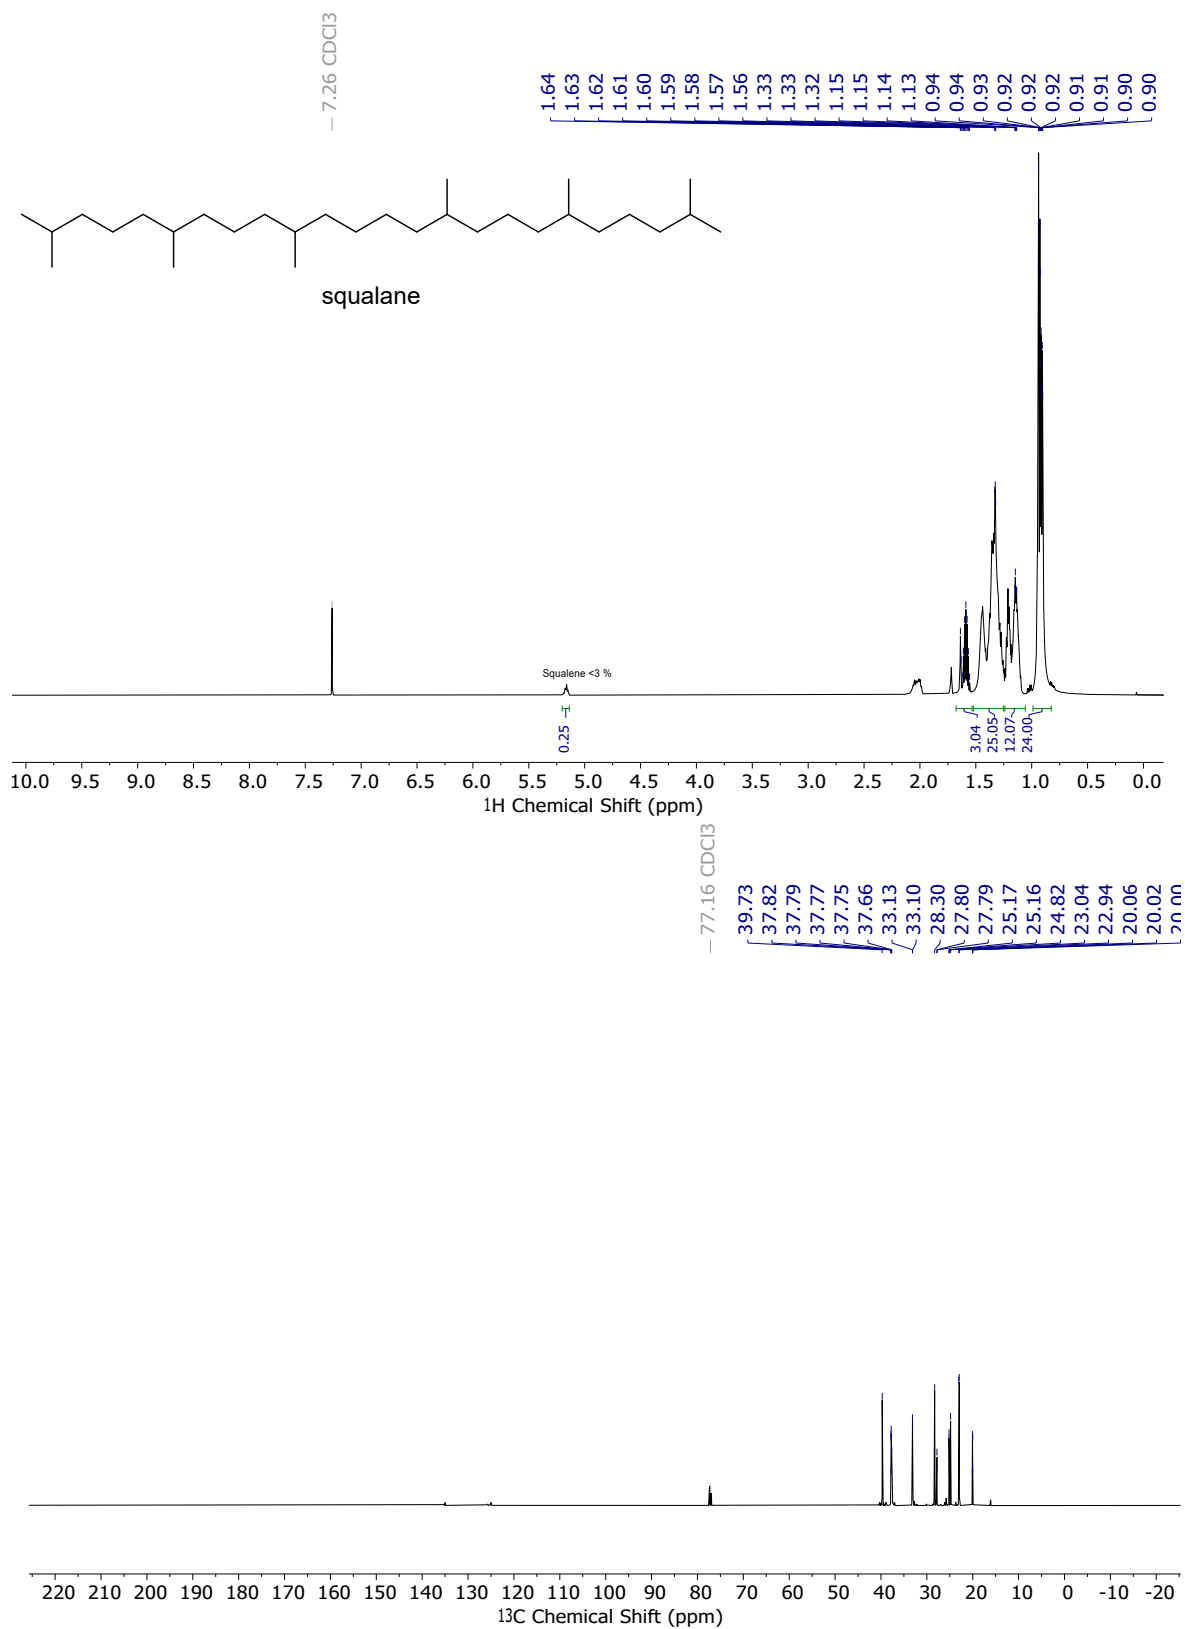



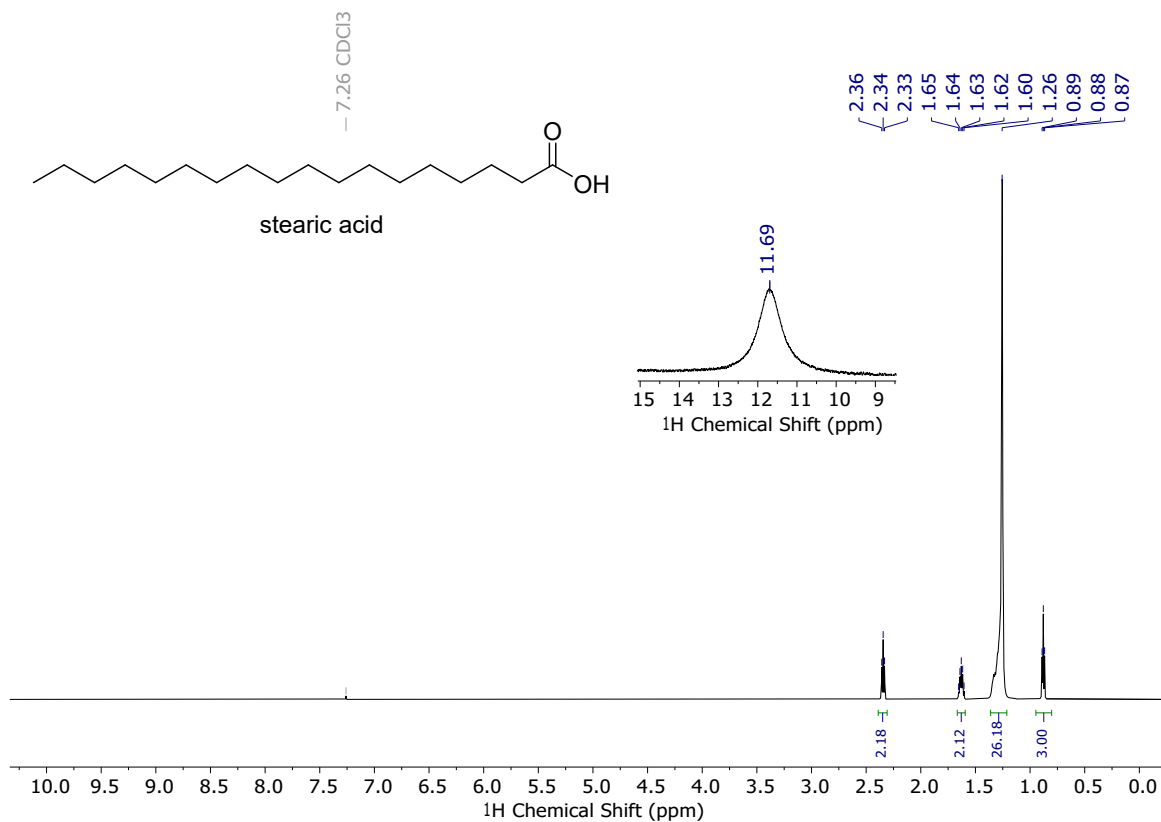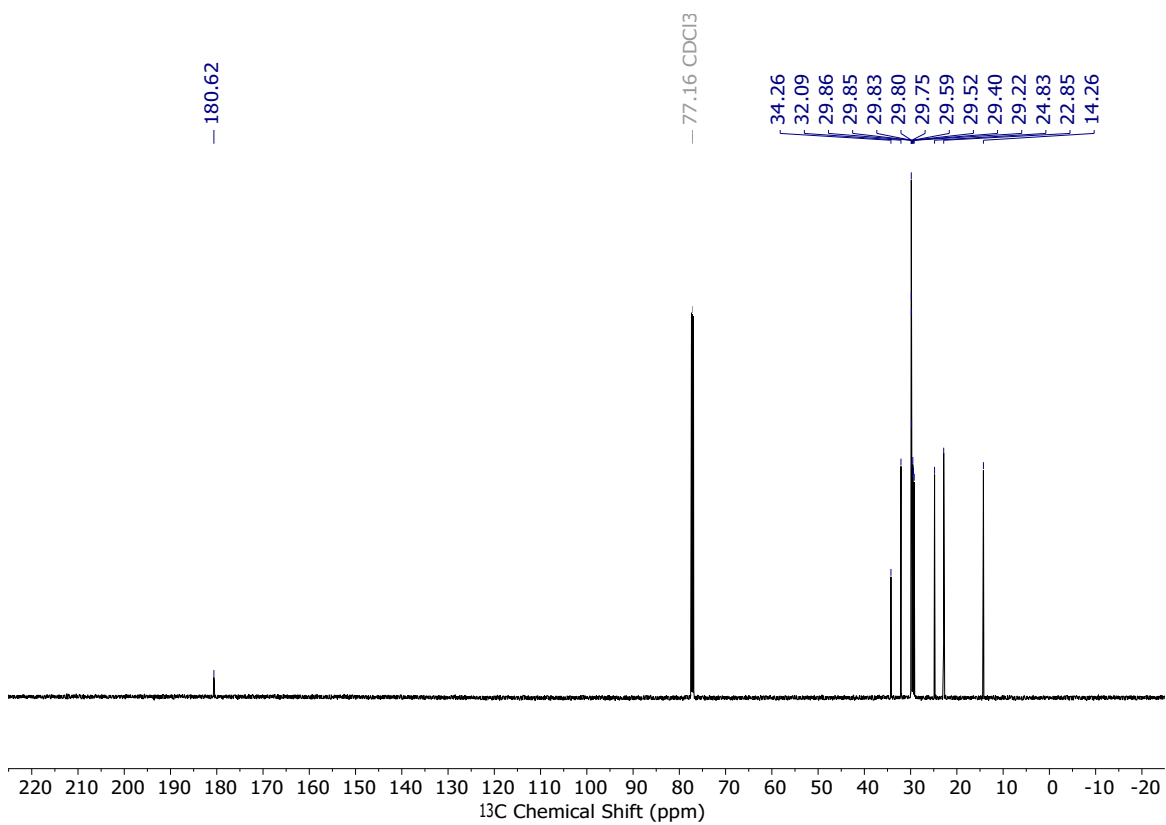

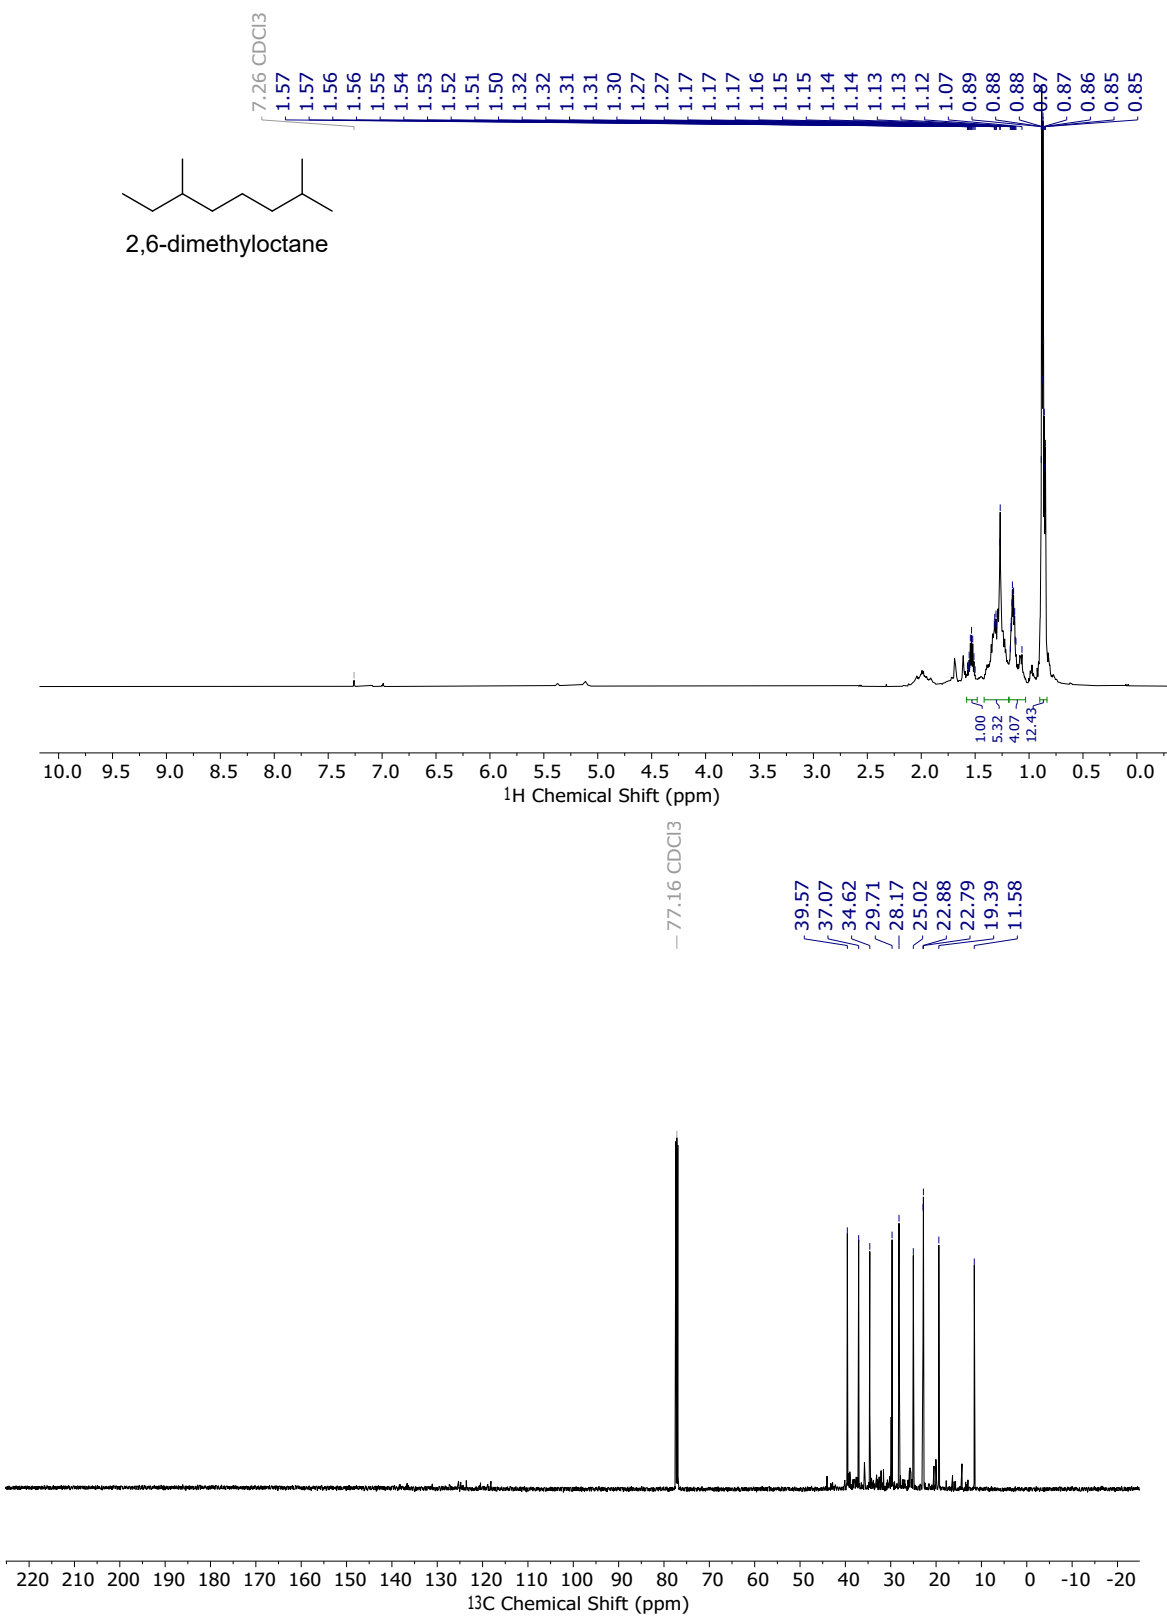

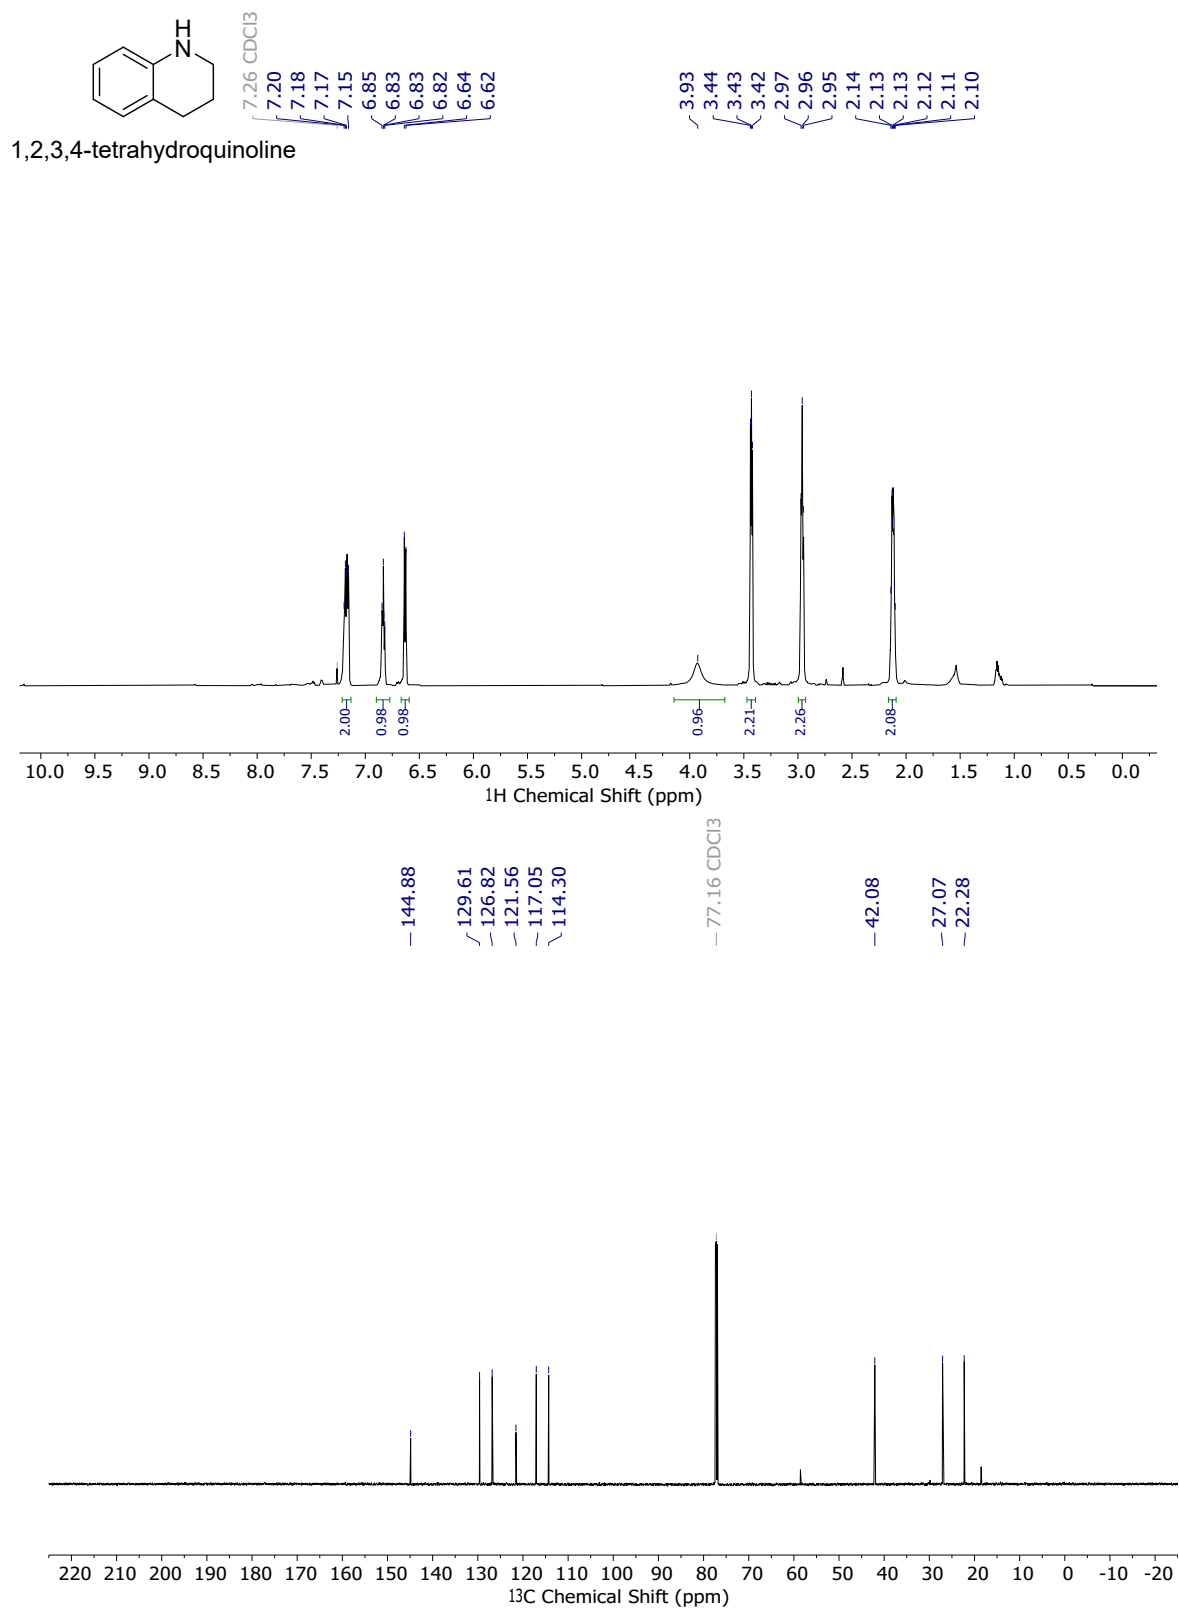

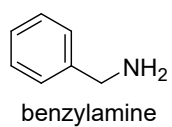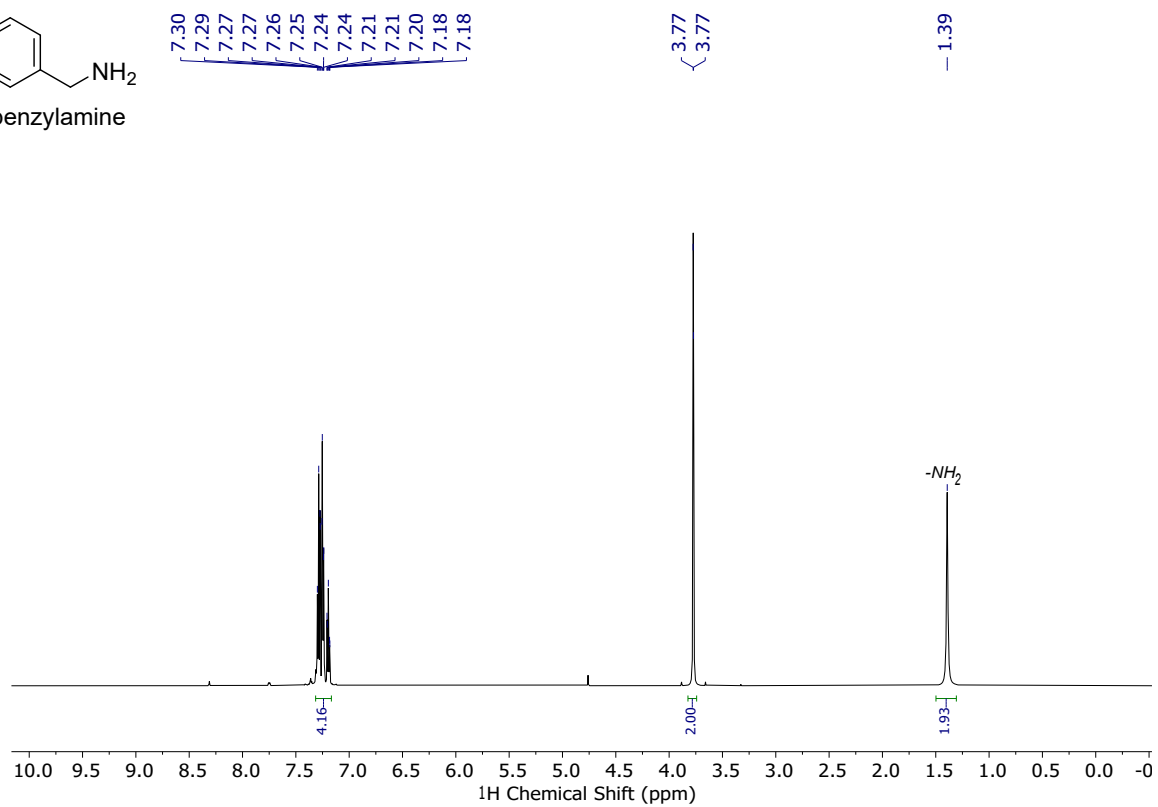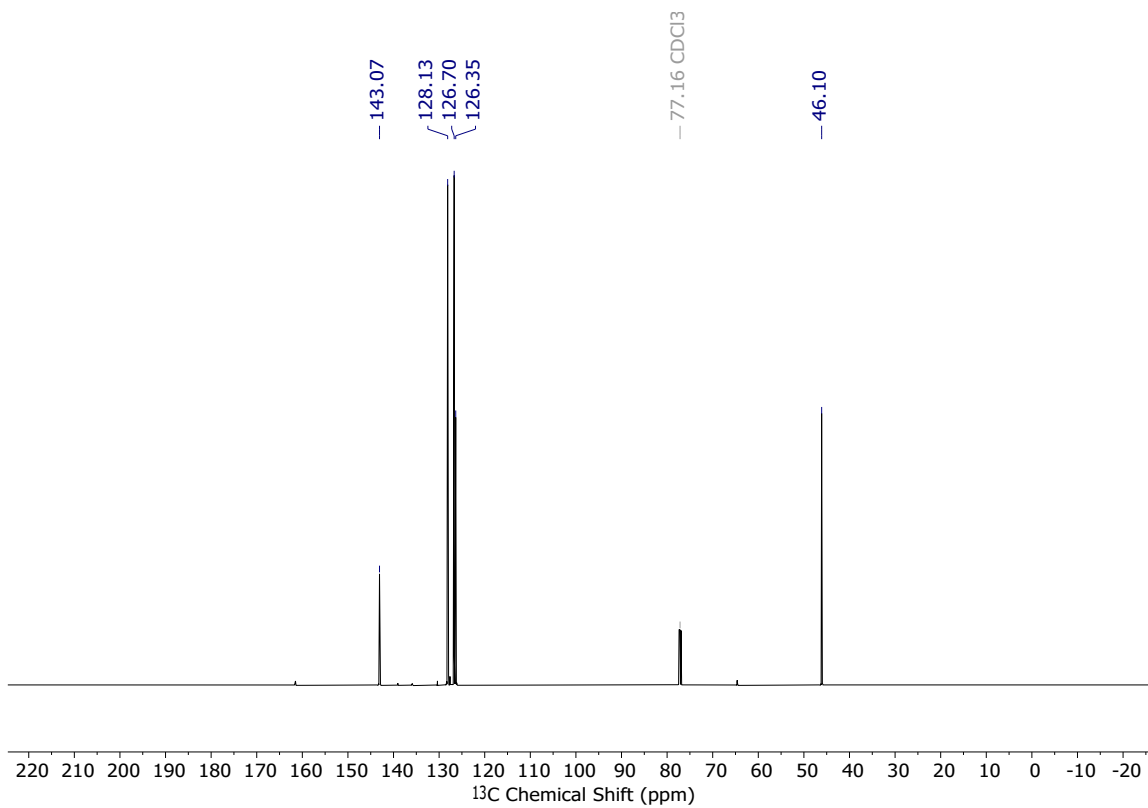

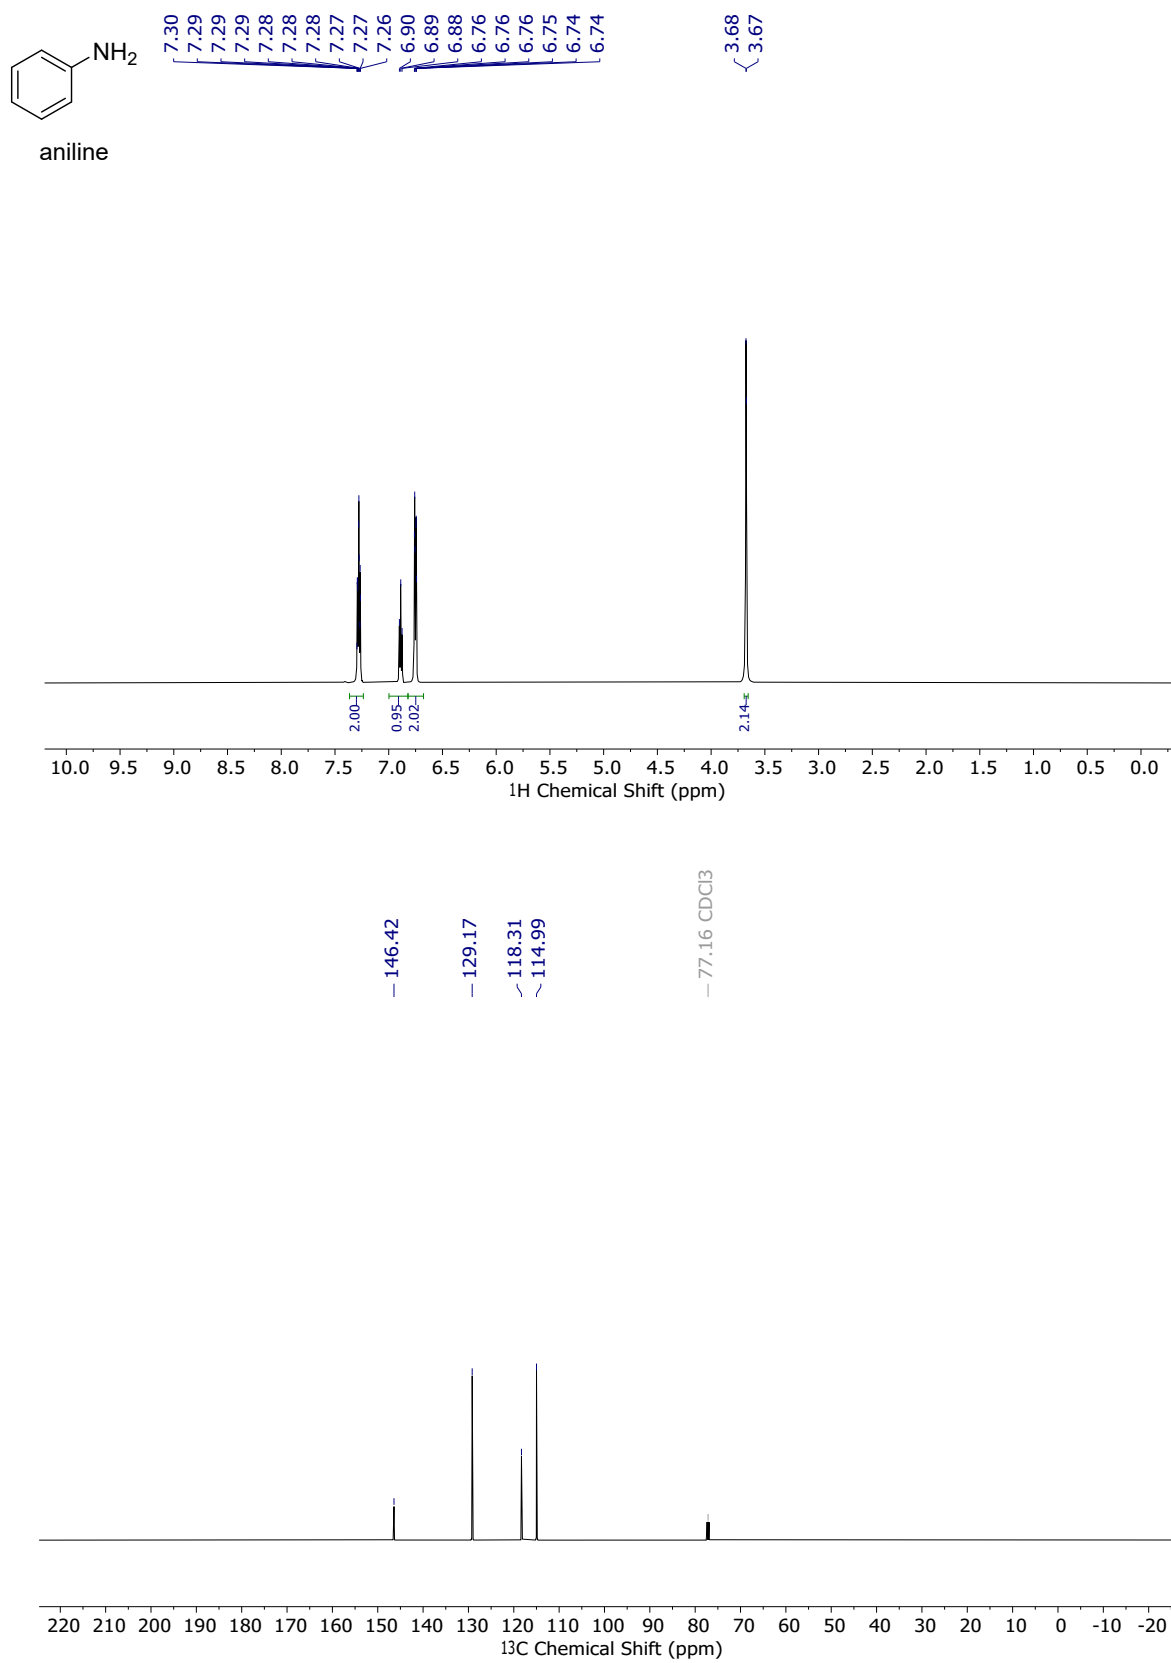

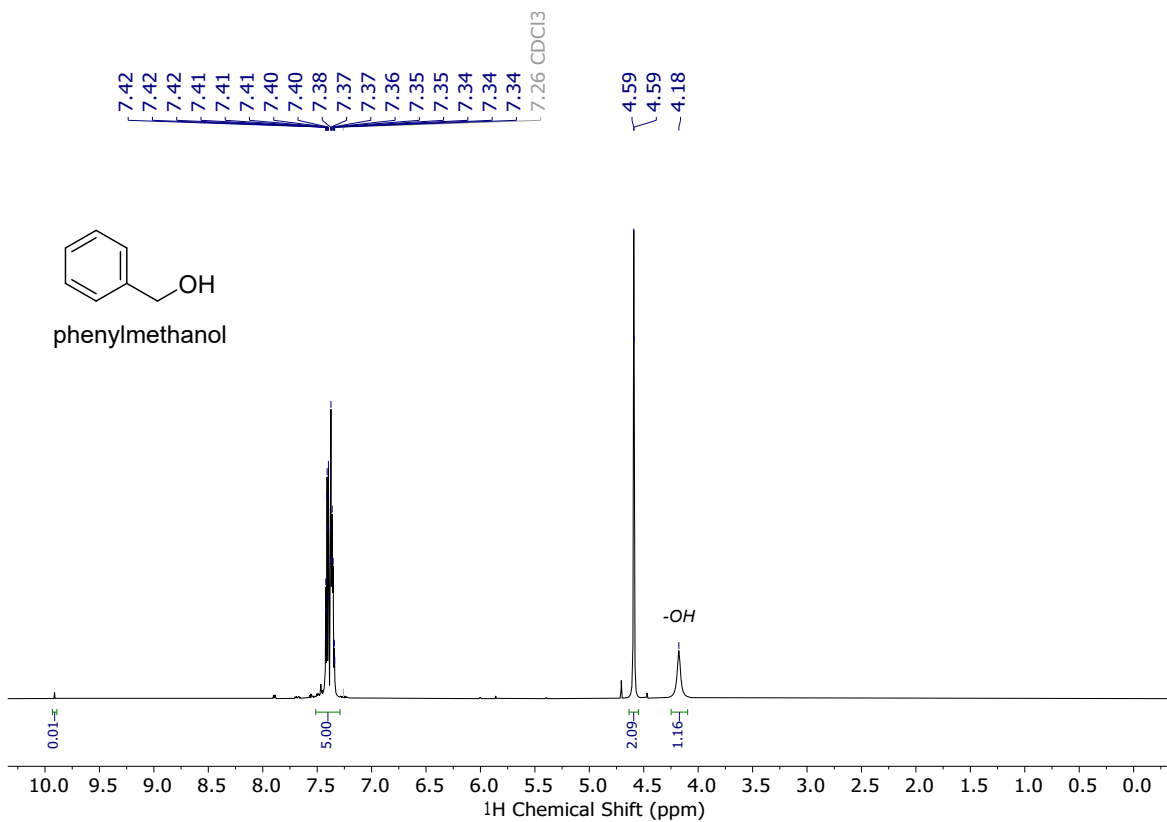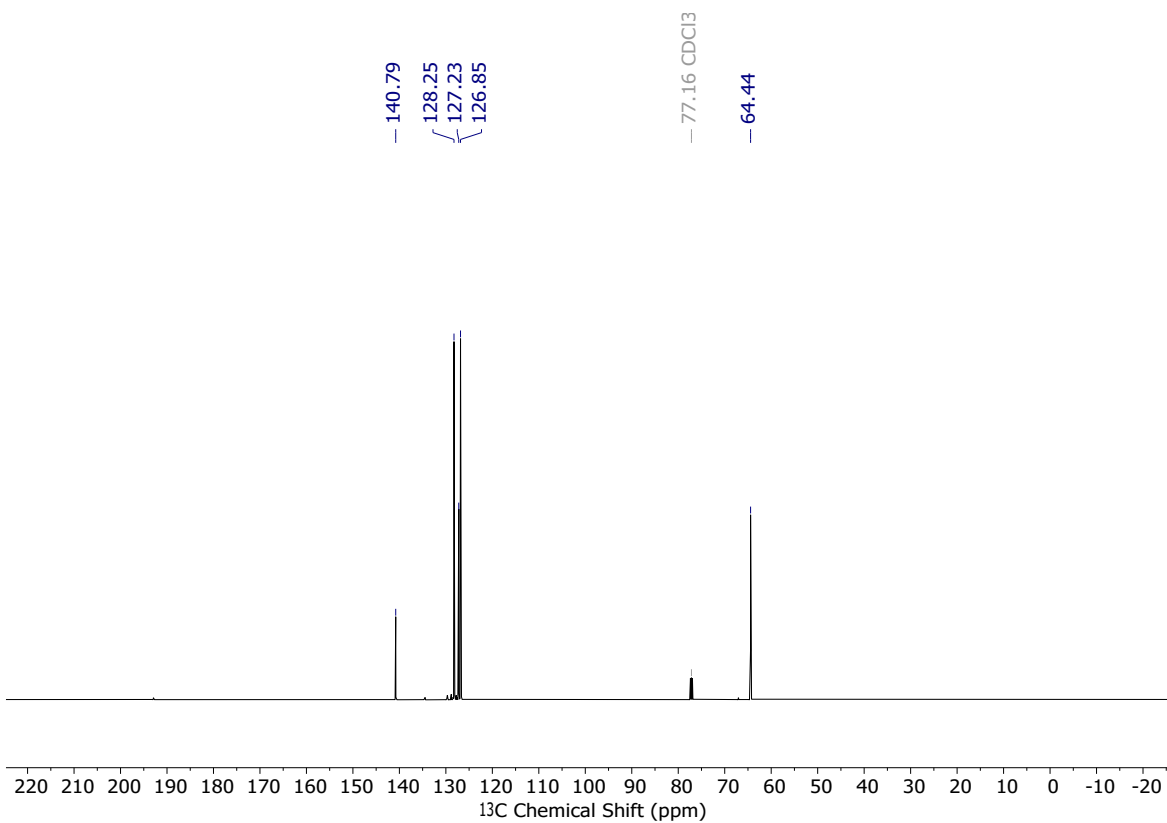

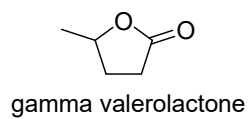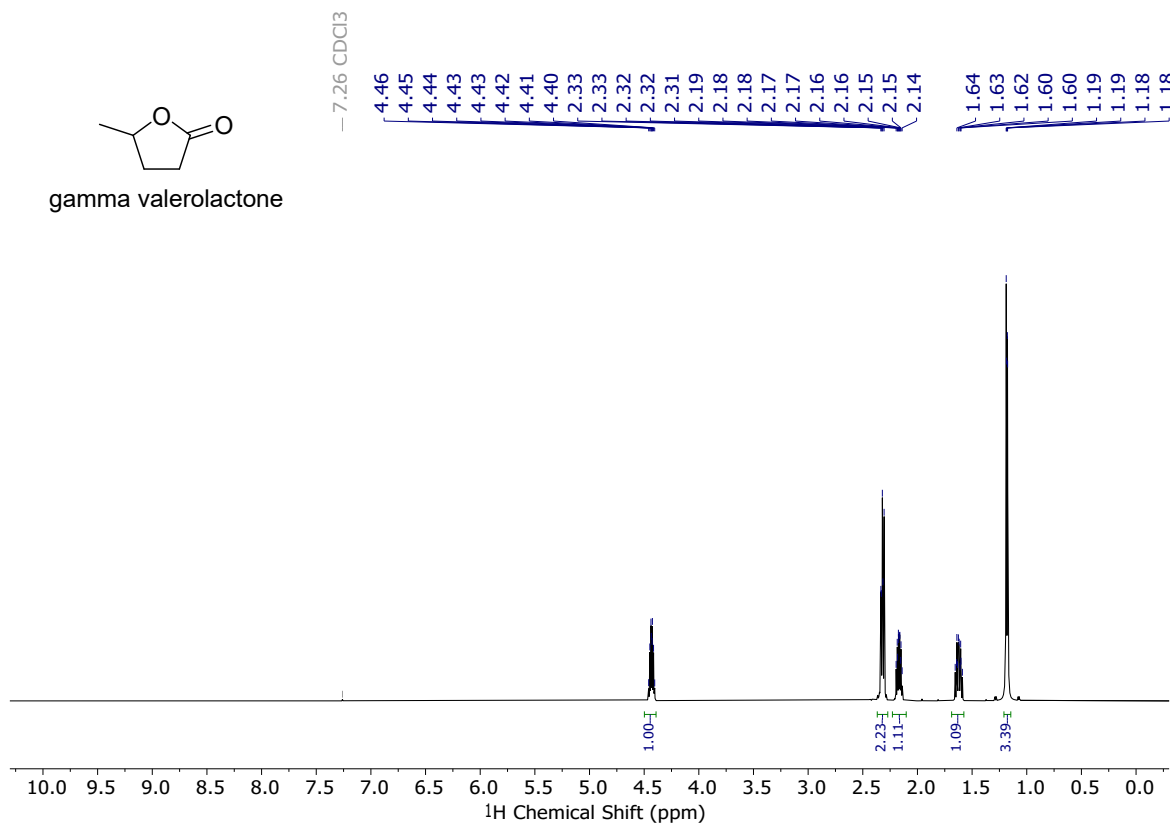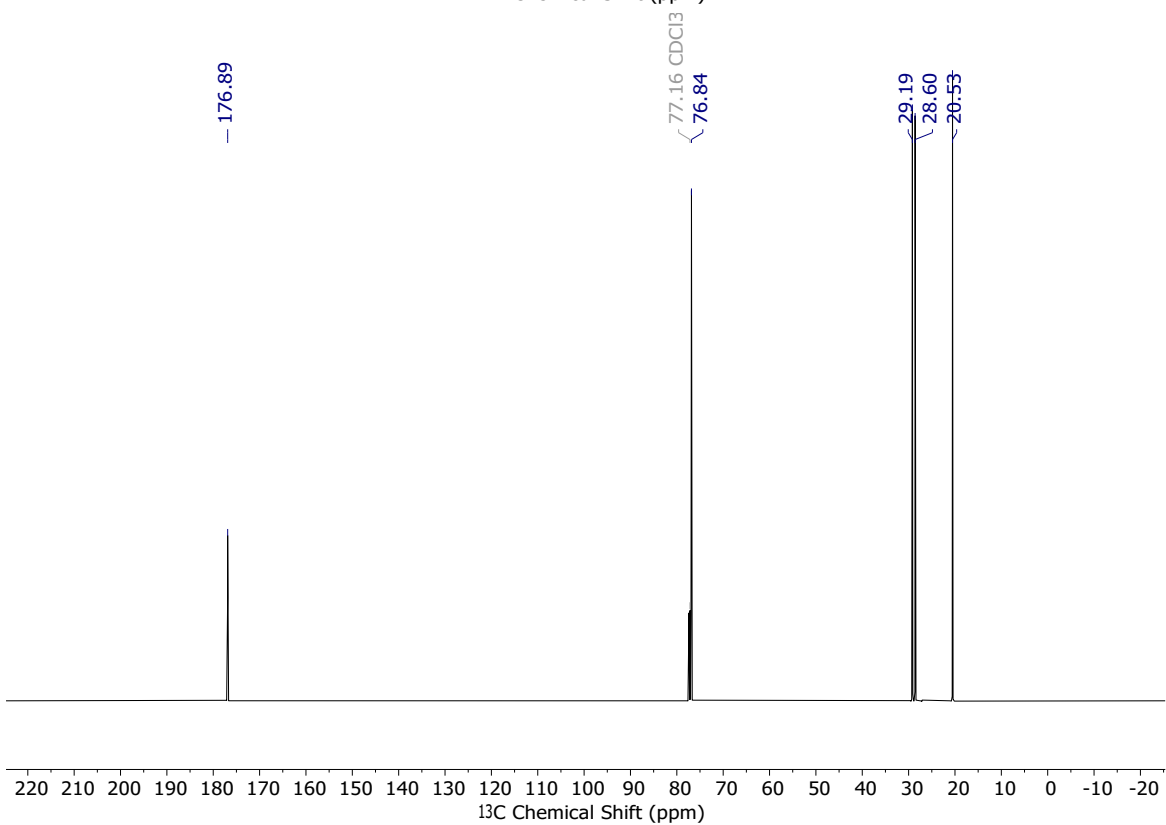

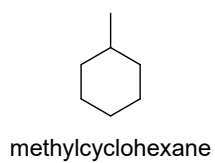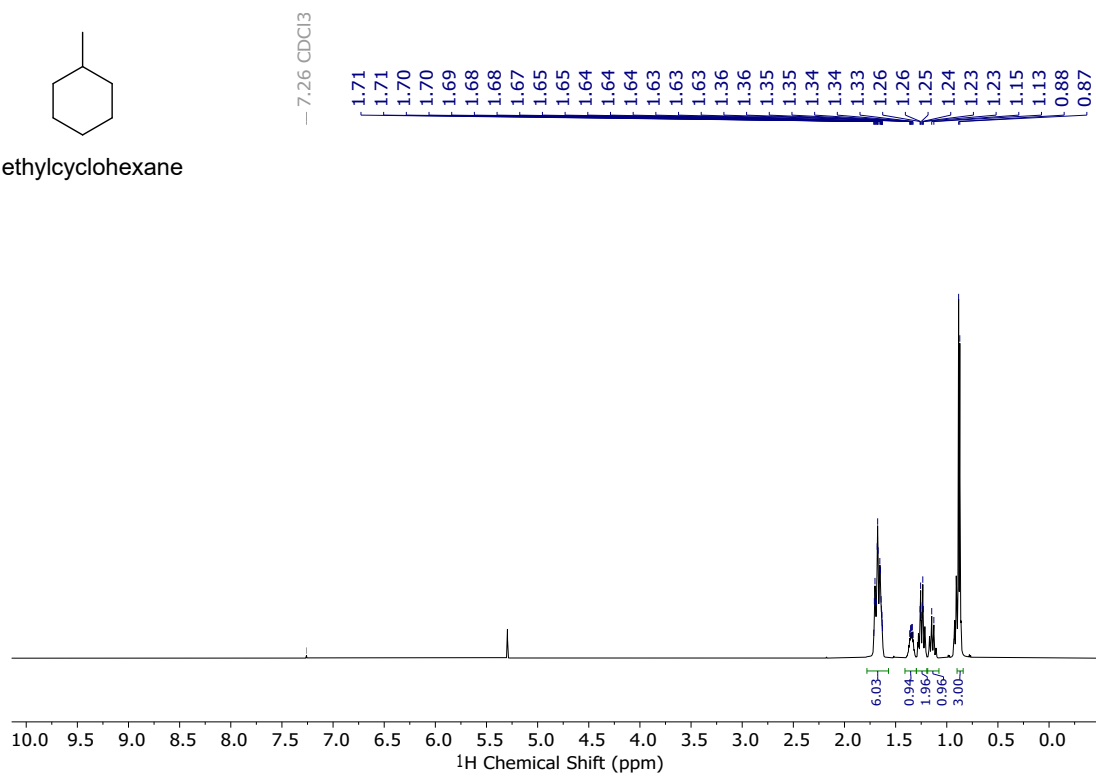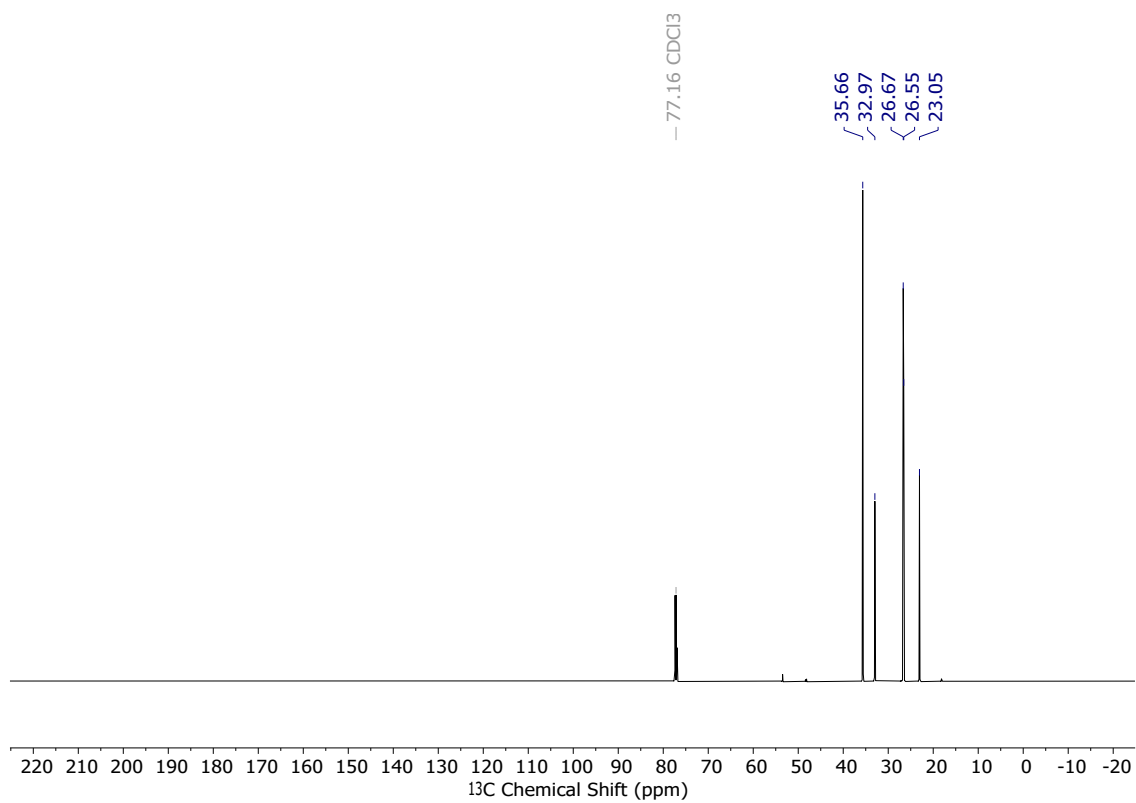



### M. Bibliography

- (1) Bergeret, G.; Gallezot, P. Particle Size and Dispersion Measurements. In *Handbook of Heterogeneous Catalysis*; John Wiley & Sons, Ltd, 2008; pp 738–765. <https://doi.org/10.1002/9783527610044.hetc0038>.
- (2) Serrano-Maldonado, A.; Bendouan, A.; Silly, M. G.; Pla, D.; Gómez, M. Selective Catalytic Hydrogenation of Fatty Acids with Cobalt–Halloysite Nanocomposites for Waste Valorization. *ACS Appl. Nano Mater.* **2023**, *6* (13), 11317–11326. <https://doi.org/10.1021/acsanm.3c01361>.
- (3) Spies, P.; Schwendemann, S.; Lange, S.; Kehr, G.; Fröhlich, R.; Erker, G. Metal-Free Catalytic Hydrogenation of Enamines, Imines, and Conjugated Phosphinoalkenylboranes. *Angewandte Chemie International Edition* **2008**, *47* (39), 7543–7546. <https://doi.org/10.1002/anie.200801432>.
- (4) Espinal-Viguri, M.; Neale, S. E.; Coles, N. T.; Macgregor, S. A.; Webster, R. L. Room Temperature Iron-Catalyzed Transfer Hydrogenation and Regioselective Deuteration of Carbon–Carbon Double Bonds. *J. Am. Chem. Soc.* **2019**, *141* (1), 572–582. <https://doi.org/10.1021/jacs.8b11553>.
- (5) Pérez Alonso, A.; Mauriés, S.; Ledeuil, J.-B.; Madec, L.; Pham Minh, D.; Pla, D.; Gómez, M. Nickel Nanoparticles Immobilized on Pristine Halloysite: An Outstanding Catalyst for Hydrogenation Processes. *ChemCatChem* **2022**, *14* (22), e202200775. <https://doi.org/10.1002/cctc.202200775>.
- (6) Udayakumar, V.; Pandurangan, A. A Novel Route for the Synthesis of Alkanes from Glycerol in a Two Step Process Using a Pd/SBA-15 Catalyst. *RSC Adv.* **2015**, *5* (96), 78719–78727. <https://doi.org/10.1039/C5RA10744J>.
- (7) Pulido-Díaz, I. T.; Serrano-Maldonado, A.; López-Suárez, C. C.; Méndez-Ocampo, P. A.; Portales-Martínez, B.; Gutiérrez-Alejandre, A.; Salas-Martin, K. P.; Guerrero-Ríos, I. RhNPs Supported on N -Functionalized Mesoporous Silica: Effect on Catalyst Stabilization and Catalytic Activity. *Dalton Trans.* **2021**, *50* (9), 3289–3298. <https://doi.org/10.1039/D0DT04213G>.
